# Supplementary material for: Heritable targeted gene disruption in zebrafish using designed zinc-finger nucleases
Source: Springer Nature journal article supplement (doi:10.1038/nbt1409), 2008-05-25
Supplement: 41587_2008_BFnbt1409_MOESM10_ESM.pdf [file 41587_2008_BFnbt1409_MOESM10_ESM.pdf]

**Supplementary Information for Doyon et al., “Heritable Targeted Gene Disruption in Zebrafish Using Designed Zinc Finger Nucleases”**

**Table of Contents**

|               |                                                                                                                                      |
|---------------|--------------------------------------------------------------------------------------------------------------------------------------|
| Methods       | Describes design, assembly, and in vitro evaluation of ZFNs, describes in detail the yeast reporter system, and lists references     |
| Supp. Fig. 1  | Schematic of the PCR-based ZFN assembly procedure from individual 2-finger modules                                                   |
| Supp. Fig. 2  | ELISA data for DNA binding by all ZFPs designed and assembled against the <i>golden</i> locus                                        |
| Supp. Fig. 3  | Schematic, restriction map, and sequence of the reporter plasmid used in the budding yeast ZFN activity screening system             |
| Supp. Fig. 4  | Vector map and full DNA/amino acid sequence of the ZFNs used for <i>golden</i> gene disruption                                       |
| Supp. Fig. 5  | ELISA data for DNA binding by all ZFPs designed and assembled against the <i>ntl</i> locus                                           |
| Supp. Fig. 6  | The full DNA/amino acid sequence of the ZFNs used for <i>ntl</i> gene disruption                                                     |
| Supp. Fig. 7  | ZFN injection can cause hypomorphic phenotypes                                                                                       |
| Supp. Fig. 8  | Injection of <i>ntl</i> ZFN-encoding mRNA into zebrafish embryos induces disruption of the <i>ntl</i> gene in somatic cells          |
| Supp. Fig. 9  | Injection of <i>ntl</i> ZFN-encoding mRNA into wildtype embryos induces tail phenotypes in juvenile and adult fish                   |
| Supp. Fig. 10 | Injection of <i>ntl</i> ZFN-encoding mRNA into wildtype embryos induces biallelic disruption of the <i>ntl</i> gene in somatic cells |
| Supp. Fig. 11 | Analysis of ZFN action at potential off-target sites                                                                                 |
| Supp. Table 1 | ZFN pairs designed against the <i>golden</i> locus                                                                                   |
| Supp. Table 2 | ZFN pairs designed against the <i>ntl</i> locus                                                                                      |
| Supp. Table 3 | Primer sequences used to genotype potential off-target sites for ZFN action                                                          |
| Supp. Table 4 | Plasmid designations for ZFN expression vectors                                                                                      |

## **Supplementary Methods**

### **Design, assembly, and *in vitro* evaluation of ZFN constructs**

The published literature has accumulated a very extensive collection of methods for developing zinc finger proteins that target a sequence of one's choosing (Pabo et al, 2001). These include the rational elaboration of the protein-DNA interface (Desjarlais & Berg, 1992), use of affinity selection methodologies such as phage display (Rebar & Pabo, 1994; Greisman & Pabo, 1997; Segal et al, 1999; Beerli et al, 2000; Dreier et al, 2001; Isalan & Choo, 2001), biological selection methods such as 1 or 2-hybrid systems in budding yeast (Bartsevich & Juliano, 2000) or bacteria (Joung et al, 2000), and the use of naturally occurring zinc fingers (Bae et al, 2003). These strategies, combined with the modular reassortment of zinc fingers with pre-characterized specificities (Wright et al, 2006), have been successfully used by a large number of laboratories to develop DNA binding domains that engage investigator-specified targets in living cells in a broad range of organisms (Choo et al, 1994; Beerli et al, 1998; Beerli et al, 2000; Zhang et al, 2000; Bibikova et al, 2001; Liu et al, 2001; Bibikova et al, 2002; Ren et al, 2002; Bartsevich et al, 2003; Porteus & Baltimore, 2003; Reynolds et al, 2003; Tan et al, 2003; Lloyd et al, 2005; Wright et al, 2005; Beumer et al, 2006; Morton et al, 2006).

The particular approach we have adopted for developing zinc finger proteins for genome editing applications relies on an archive of pre-characterized two-finger modules, each of which recognizes an experimentally validated 6 bp half-site (Isalan et al, 2001; Moore et al, 2001). To develop ZFNs directed against zebrafish *gol* and *ntl* cDNAs, these sequences were scanned for positions where modules exist in the archive that allow the fusion of two such modules to form a 4-finger protein (ZFN-R) with a composite 12 bp target site recognized on the Watson strand, and another such 4 finger protein (ZFN-L) that recognizes a 12 bp target site on the Crick strand, 5 or 6 bp away from the 5' most base pair recognized by ZFN-R.

While a detailed analysis of the relative merits of the various approaches to ZFP design is outside the scope of the present discussion, we note that the process described above reliably produces ZFPs that pass DNA binding ELISA assays (see Supplementary Figs. 2 and 5), pass functional assays for activity in yeast-based proxy systems (Fig. 2A and 3A), and, when fused to the FokI endonuclease domain, efficiently and specifically engage their intended, endogenous target loci in the context of complex genomes such as zebrafish (present work), hamster (Santiago et al, 2008), and human (Urnov et al, 2005; Lombardo et al, 2007; Miller et al, 2007; Perez et al, *Nature Biotechnology*, in press).

These ZFNs are assembled using a PCR-based procedure described in Supplementary Fig. 1. In brief, each two-finger module is amplified by PCR in a separate reaction. The two PCR products that correspond to the two-finger modules that compose each ZFN are then combined and joined by conventional restriction enzyme digestion-ligation into a ZFN expression vector to yield a gene encoding (NH<sub>2</sub> to COOH) a triple-FLAG tag, a nuclear localization signal, the ZFP module, and the endonuclease domain of the type IIS restriction enzyme FokI. The ZFN coding region is flanked with the cytomegalovirus (CMV) immediate-early promoter and bovine growth hormone (BGH) polyadenylation signal. The complete sequence of all ZFNs used in this work are shown in Supplementary Figs. 4 and 6. Each ZFN was evaluated for DNA binding using an ELISA assay performed as described (Bartsevich et al, 2003).

The *in vitro* consensus binding site for each ZFN was determined using a procedure described in detail elsewhere (Perez et al, *Nature Biotechnology* in press). In brief, HA-tagged ZFPs were synthesized by *in vitro* transcription-translation, and SELEX was performed by incubation with a pool of randomized DNA sequences and an anti-HA biotin-coupled antibody, capture of protein-bound DNA by streptavidin magnetic-coated beads, and PCR-based amplification of the bound DNA, and use of the resulting PCR pool in a second round of SELEX.

This procedure was repeated for a total of 4 rounds of selection, and DNA fragments amplified after the final round were cloned and sequenced.

## **Use of a Budding Yeast-Based Reporter System to Identify ZFN Pairs for Gene Disruption**

### *Construction of the reporter plasmid*

The reporter construct was targeted to the HO locus using the yeast integrating plasmid (YIp) HO-poly-KanMX-HO (Voth et al, 2001). To generate the SSA reporter (Supplementary Fig. 3), a fragment corresponding to nucleotides 1 to 750 of the *MEL1* gene (Liljestrom, 1985) (relative to the ATG) was cloned into the SalI and BamHI sites of HO-poly-KanMX-HO using the following primers: 5'-AATTGTCGACATGTTTGCTTTCTACTTTCTCACCGC-3' and 5'-AATTGGATCCCCCATTGGAGCTGCC-3'. Then a fragment from nucleotides 299 to 2100 was cloned into the SacI and EcoRI sites using the following primers: 5'-AATTGAGCTCAGACCACCTGCATAATAACAGC-3' and 5'-AATTGAATTCGGGCAAAAATTGGTACCAATGC-3'. Finally, a 1489 bp fragment of the *PGK1* promoter was cloned into the BsiWI and SalI sites using the following primers: 5'-AATTCGTACGTCTAACTGATCTATCCAAAAGT-3' and 5'-AATTGTCGACTTGATCTTTTGGTTTTATATTGTTG-3'.

### *Construction of the reporter strain*

Integration of the reporter construct into the 69-1B strain (S288C background; *MATa his3 200 lys2-128 $\delta$  leu2 1*) was performed as described (Voth et al, 2001). Note that the designer deletion strain BY4741, available from Open Biosystems, provides the same characteristics as the 69-1B strain used in this study. Briefly, 2  $\mu$ g of the reporter construct containing the target sequence was

linearized with NotI and used to transform yeast using the lithium acetate method (Gietz & Schiestl, 2007). We confirmed correct integration by colony PCR using the following primers: HO-L: 5'-TATTAGGTGTGAAACCACGAAAAGT-3' and 5'-ACTGTCATTGGGAATGTCTTATGAT-3'; HO-R: 5'-ATTACGCTCGTCATCAAAAATCA-3'; 5'-CATGTCTTCTCGTTAAGACTGCAT-3'.

#### *ZFN expression vectors*

The entire coding sequence of each ZFN pair was transferred to galactose inducible expression vectors using standard cloning procedures (Mumberg et al, 1994; Urnov et al, 2005; Moehle et al, 2007). These YCp vectors, p413prom and p415prom, are available through the ATCC (Mumberg et al, 1994). Transformation of the reporter strain with the ZFN expression vectors (plasmid names listed in Supplementary Table 4) was done in deep well blocks as described (Gietz & Schiestl, 2007).

#### *Induction of ZFN expression*

To derepress the *GALI* promoter, the pools of transformants were diluted 1:10 into 1 ml of SC His-Leu- medium containing 2% raffinose as a source of carbon and incubated overnight at 30°C. ZFN expression was induced by diluting the raffinose cultures 1:10 into 1ml of SC His-Leu- medium containing 2% galactose. Cells were then incubated for 2 to 6 hours, before addition of 2% glucose to stop expression. Cells were then incubated overnight to allow for DSB repair and reporter expression.

#### *Reporter assay (MEL1 assay)*

The first step was to determine the cell density of the cultures in order to normalize the reporter signal to the amount of cells in the culture. This was done by a simple spectrophotometric reading

at 600 nm. The deep well block was then centrifuged at 3000g for 5 minutes to pellet yeast cells and 10 ul of the media was assayed for Mel1 activity as described (Ryan et al, 1998; Chen et al, 2004).

## References for Supplementary Information

Bae KH, Kwon YD, Shin HC, Hwang MS, Ryu EH, Park KS, Yang HY, Lee DK, Lee Y, Park J, Kwon HS, Kim HW, Yeh BI, Lee HW, Sohn SH, Yoon J, Seol W, Kim JS (2003) Human zinc fingers as building blocks in the construction of artificial transcription factors. *Nat Biotechnol* **21**: 275-280

Bartsevich VV, Juliano RL (2000) Regulation of the MDR1 gene by transcriptional repressors selected using peptide combinatorial libraries. *Mol Pharmacol* **58**: 1-10.

Bartsevich VV, Miller JC, Case CC, Pabo CO (2003) Engineered zinc finger proteins for controlling stem cell fate. *Stem Cells* **21**: 632-637

Beerli RR, Dreier B, Barbas CF, 3rd (2000) Positive and negative regulation of endogenous genes by designed transcription factors. *Proc Natl Acad Sci U S A* **97**: 1495-1500

Beerli RR, Segal DJ, Dreier B, Barbas CF, 3rd (1998) Toward controlling gene expression at will: specific regulation of the erbB-2/HER-2 promoter by using polydactyl zinc finger proteins constructed from modular building blocks. *Proc Natl Acad Sci U S A* **95**: 14628-14633

Beumer K, Bhattacharyya G, Bibikova M, Trautman JK, Carroll D (2006) Efficient gene targeting in *Drosophila* with zinc-finger nucleases. *Genetics* **172**: 2391-2403

Bibikova M, Carroll D, Segal DJ, Trautman JK, Smith J, Kim YG, Chandrasegaran S (2001) Stimulation of homologous recombination through targeted cleavage by chimeric nucleases. *Mol Cell Biol* **21**: 289-297.

Bibikova M, Golic M, Golic KG, Carroll D (2002) Targeted chromosomal cleavage and mutagenesis in *Drosophila* using zinc-finger nucleases. *Genetics* **161**: 1169-1175.

Chen Q, Chen J, Sun T, Shen J, Shen X, Jiang H (2004) A yeast two-hybrid technology-based system for the discovery of PPAR $\gamma$  agonist and antagonist. *Analytical biochemistry* **335**: 253-259

Choo Y, Sanchez-Garcia I, Klug A (1994) In vivo repression by a site-specific DNA-binding protein designed against an oncogenic sequence. *Nature* **372**: 642-645.

Desjarlais JR, Berg JM (1992) Toward rules relating zinc finger protein sequences and DNA binding site preferences. *Proc Natl Acad Sci U S A* **89**: 7345-7349

Dreier B, Beerli RR, Segal DJ, Flippin JD, Barbas CF, 3rd (2001) Development of zinc finger domains for recognition of the 5'-ANN-3' family of DNA sequences and their use in the construction of artificial transcription factors. *J Biol Chem* **276**: 29466-29478.

Gietz RD, Schiestl RH (2007) Microtiter plate transformation using the LiAc/SS carrier DNA/PEG method. *Nature protocols* **2**: 5-8

Greisman HA, Pabo CO (1997) A general strategy for selecting high-affinity zinc finger proteins for diverse DNA target sites. *Science* **275**: 657-661

Isalan M, Choo Y (2001) Rapid, high-throughput engineering of sequence-specific zinc finger DNA-binding proteins. *Methods Enzymol* **340**: 593-609

Isalan M, Klug A, Choo Y (2001) A rapid, generally applicable method to engineer zinc fingers illustrated by targeting the HIV-1 promoter. *Nat Biotechnol* **19**: 656-660.

Joung JK, Ramm EI, Pabo CO (2000) A bacterial two-hybrid selection system for studying protein-DNA and protein-protein interactions. *Proc Natl Acad Sci U S A* **97**: 7382-7387

Liljestrom PL (1985) The nucleotide sequence of the yeast MEL1 gene. *Nucleic Acids Res* **13**: 7257-7268

Liu PQ, Rebar EJ, Zhang L, Liu Q, Jamieson AC, Liang Y, Qi H, Li PX, Chen B, Mendel MC, Zhong X, Lee YL, Eisenberg SP, Spratt SK, Case CC, Wolffe AP (2001) Regulation of an endogenous locus using a panel of designed zinc finger proteins targeted to accessible chromatin regions. Activation of vascular endothelial growth factor A. *J Biol Chem* **276**: 11323-11334.

Lloyd A, Plaisier CL, Carroll D, Drews GN (2005) Targeted mutagenesis using zinc-finger nucleases in Arabidopsis. *Proc Natl Acad Sci U S A* **102**: 2232-2237

Lombardo A, Genovese P, Beausejour CM, Colleoni S, Lee YL, Kim KA, Ando D, Urnov FD, Galli C, Gregory PD, Holmes MC, Naldini L (2007) Gene editing in human stem cells using zinc finger nucleases and integrase-defective lentiviral vector delivery. *Nat Biotechnol* **25**: 1298-1306

Miller JC, Holmes MC, Wang J, Guschin DY, Lee YL, Rupniewski I, Beausejour CM, Waite AJ, Wang NS, Kim KA, Gregory PD, Pabo CO, Rebar EJ (2007) An improved zinc-finger nuclease architecture for highly specific genome editing. *Nat Biotechnol* **25**: 778-785

Moehle EA, Rock JM, Lee YL, Jouvenot Y, Dekelver RC, Gregory PD, Urnov FD, Holmes MC (2007) Targeted gene addition into a specified location in the human genome using designed zinc finger nucleases. *Proc Natl Acad Sci U S A* **104**: 3055-3060

Moore M, Choo Y, Klug A (2001) Design of polyzinc finger peptides with structured linkers. *Proc Natl Acad Sci U S A* **98**: 1432-1436.

Morton J, Davis MW, Jorgensen EM, Carroll D (2006) Induction and repair of zinc-finger nuclease-targeted double-strand breaks in *Caenorhabditis elegans* somatic cells. *Proc Natl Acad Sci U S A* **103**: 16370-16375

Mumberg D, Muller R, Funk M (1994) Regulatable promoters of *Saccharomyces cerevisiae*: comparison of transcriptional activity and their use for heterologous expression. *Nucleic Acids Res* **22**: 5767-5768

Pabo CO, Peisach E, Grant RA (2001) Design and Selection of Novel Cys2His2 Zinc Finger Proteins. *Annu Rev Biochem* **70**: 313-340.



- Porteus MH, Baltimore D (2003) Chimeric nucleases stimulate gene targeting in human cells. *Science* **300**: 763.
- Rebar EJ, Pabo CO (1994) Zinc finger phage: affinity selection of fingers with new DNA-binding specificities. *Science* **263**: 671-673
- Ren D, Collingwood TN, Rebar EJ, Wolffe AP, Camp HS (2002) PPAR $\gamma$  knockdown by engineered transcription factors: exogenous PPAR $\gamma$ 2 but not PPAR $\gamma$ 1 reactivates adipogenesis. *Genes Dev* **16**: 27-32.
- Reynolds L, Ullman C, Moore M, Isalan M, West MJ, Clapham P, Klug A, Choo Y (2003) Repression of the HIV-1 5' LTR promoter and inhibition of HIV-1 replication by using engineered zinc-finger transcription factors. *Proc Natl Acad Sci U S A* **100**: 1615-1620.
- Ryan MP, Jones R, Morse RH (1998) SWI-SNF complex participation in transcriptional activation at a step subsequent to activator binding. *Mol Cell Biol* **18**: 1774-1782.
- Santiago Y, Chan E, Liu PQ, Orlando S, Zhang L, Urnov FD, Holmes MC, Guschin D, Waite A, Miller JC, Rebar EJ, Gregory PD, Klug A, Collingwood TN (2008) Targeted gene knockout in mammalian cells using engineered zinc finger nucleases. *Proc Natl Acad Sci U S A* **105**: 5809-5814
- Segal DJ, Dreier B, Beerli RR, Barbas CF, 3rd (1999) Toward controlling gene expression at will: selection and design of zinc finger domains recognizing each of the 5'-GNN-3' DNA target sequences. *Proc Natl Acad Sci U S A* **96**: 2758-2763
- Tan S, Guschin D, Davalos A, Lee YL, Snowden AW, Jouvenot Y, Zhang HS, Howes K, McNamara AR, Lai A, Ullman C, Reynolds L, Moore M, Isalan M, Berg LP, Campos B, Qi H, Spratt SK, Case CC, Pabo CO, Campisi J, Gregory PD (2003) Zinc-finger protein-targeted gene regulation: genomewide single-gene specificity. *Proc Natl Acad Sci U S A* **100**: 11997-12002
- Urnov FD, Miller JC, Lee YL, Beausejour CM, Rock JM, Augustus S, Jamieson AC, Porteus MH, Gregory PD, Holmes MC (2005) Highly efficient endogenous human gene correction using designed zinc-finger nucleases. *Nature* **435**: 646-651
- Voth WP, Richards JD, Shaw JM, Stillman DJ (2001) Yeast vectors for integration at the HO locus. *Nucleic Acids Res* **29**: E59-59
- Wright DA, Thibodeau-Beganny S, Sander JD, Winfrey RJ, Hirsh AS, Eichinger M, Fu F, Porteus MH, Dobbs D, Voytas DF, Joung JK (2006) Standardized reagents and protocols for engineering zinc finger nucleases by modular assembly. *Nature protocols* **1**: 1637-1652
- Wright DA, Townsend JA, Winfrey RJ, Jr., Irwin PA, Rajagopal J, Lonosky PM, Hall BD, Jondle MD, Voytas DF (2005) High-frequency homologous recombination in plants mediated by zinc-finger nucleases. *Plant J* **44**: 693-705
- Zhang L, Spratt SK, Liu Q, Johnstone B, Qi H, Raschke EE, Jamieson AC, Rebar EJ, Wolffe AP, Case CC (2000) Synthetic zinc finger transcription factor action at an endogenous chromosomal site. Activation of the human erythropoietin gene. *J Biol Chem* **275**: 33850-33860.



**Supplementary Figure 1: Schematic of the PCR-based ZFN assembly procedure from individual 2-finger modules.** Each two-finger module is amplified by PCR in a separate reaction. The two PCR products that correspond to the two-finger modules that compose each ZFN are then combined and joined by conventional restriction enzyme digestion-ligation into a ZFN expression vector to yield a gene encoding, NH<sub>2</sub> to COOH, a triple-FLAG tag, a nuclear localization signal, the ZFP module, and the endonuclease domain of the type IIS restriction enzyme FokI.

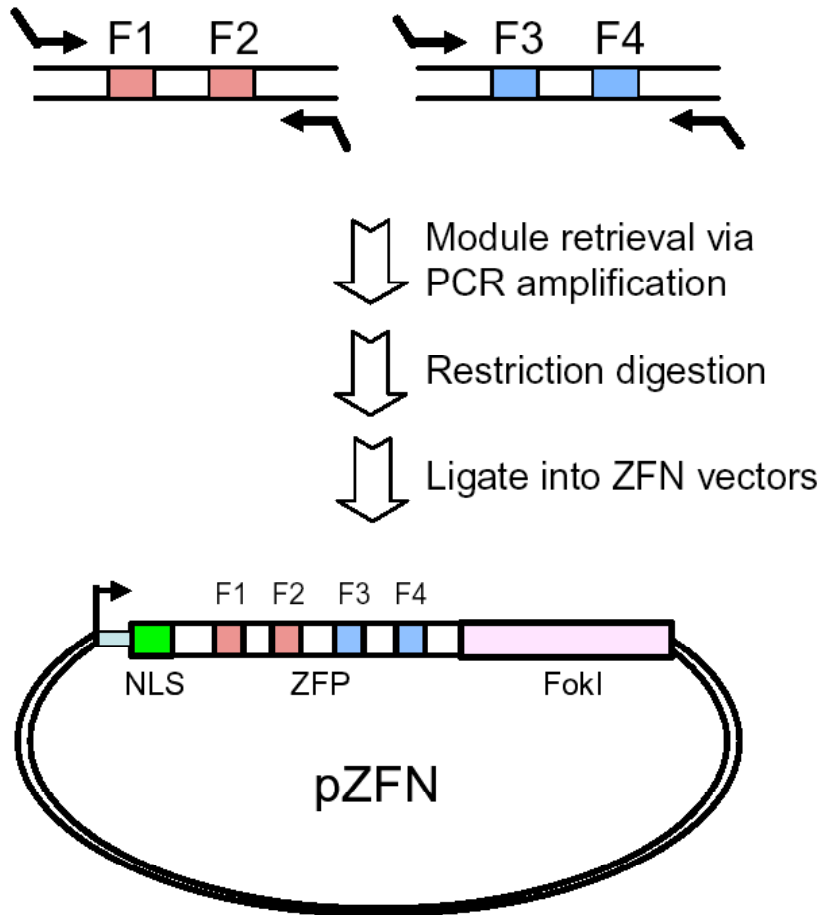

NLS: nuclear localization signal  
 F1-4: ZFP helices  
 FokI: FokI cleavage domain

**Supplementary Figure 2: ELISA data for DNA binding by all the ZFPs designed and assembled against the *golden* locus.** Each ZFN was evaluated for DNA binding using an ELISA assay performed as described (Bartsevich et al, 2003). The first sample is a negative control; the second and third sample, respectively, are positive controls and represent ZFN-R and ZFN-L from previous work (Urnov et al, 2005). Each ZFN is annotated by a specific base-pair position within the *golden* locus (the cDNA cannot be used as a reference in this context because some ZFNs span exon/intron boundaries). In this nomenclature, position #1 corresponds to the transcription start site of the *golden* gene as per the UCSC genome browser DanRer5 zebrafish genome annotation (July 2005); an “r” before the ZFN name indicates that its primary recognition is the Crick strand. The ZFNs highlighted in red form pairs 1 and 14/15, respectively, used in the primary text. Pair 1 ZFN-R is 5084a1 and ZFN-L is r5077a1; Pair 14/15 ZFN-R is 14368a1, Pair 14 ZFN-L is r14361b1, and Pair 15 ZFN-L is r14361a1..

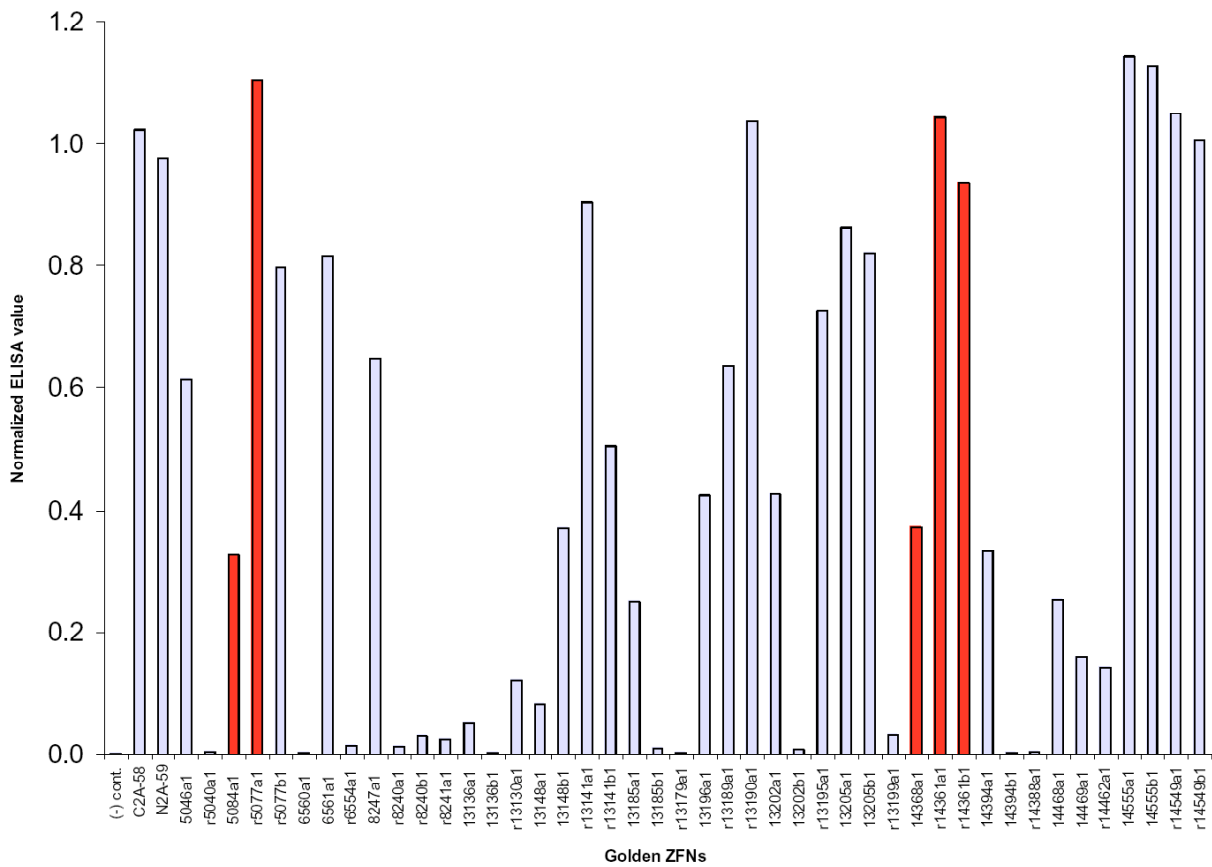

**Supplementary Figure 3: Schematic, restriction map, and sequence of the reporter plasmid used in the budding yeast ZFN activity screening system.**

Schematic and restriction map:

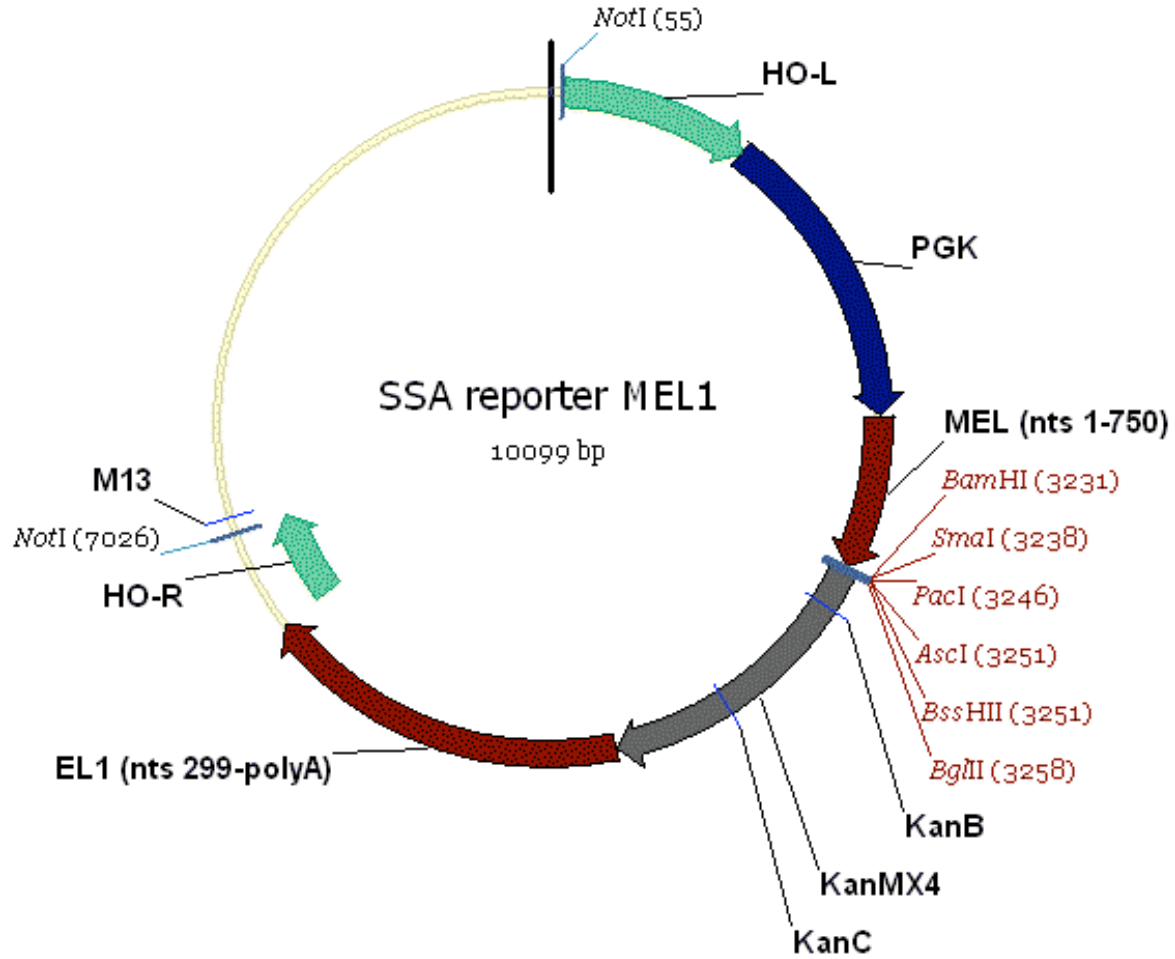

tures: total length, 10099 bp  
 HO left homology arm: bases 67-984  
 PGK1 promoter: bases 985-2473  
 5' end of the *MEL1* gene: bases 2480-3229  
 MCS: bases 3231-3257  
 kanMX4 cassette: bases 3258-4705  
 3' end of the *MEL1* gene: bases 4707-6516  
 HO right homology arm: bases 6517-7029  
 pUK21 backbone: bases 7027-54

Fea

Vector sequence (also available as a Vector NTI file from [furnov@sangamo.com](mailto:furnov@sangamo.com) upon request):

```
1 ATGACCATGA TTACGCCACT AGTCCGAGGC CTCGAGATCC GATATCGCCG TGGCGGCCGC CAGCTGAAGC TTAATTATCC TGGGCACGAG
TGAACAACAA
TACTGGTACT AATGCGGTGA TCAGGCTCCG GAGCTCTAGG CTATAGCCGC ACCGCCGGCG GTCGACTTCG AATTAATAGG ACCCGTGCTC
ACTTTGTTTC
CTAAAACCTT TATTTCATG GGCATTGAA TGTAACAATT ATATATATCG CAAGCACAAA AAATCAAGGA GAGAGAAGTA CCACTTTGTT
101 CATGFTGACA
GATTTTGGAA ATAAATCGTA CCGGTAACCT ACATTGTTAA TATATATAGC GTTCGTGTTT TTTAGTTCCT CTCTCTTGAT GGTGAAACAA
GTACACATGT
201 ATGTTTCATTA TCTCCATAAG CAAAAAATAA AAATAGAAAA CATATGCTAT AAGGTTGATA TTCTCACGAG TAAGCGGCAC TTGCTACTTA
TTGACATTGC
TACAAGTAAT AGAGGTATTC GTTTTTTTTT TTTATCTTTT GTATACGATA TTCCAACAT AAGAGTGCTC ATTCGCCGTG AACGATGAAT
AACTGTAACG
301 AGATTTTGGG CTACAGAAAT AGTATATTAG AGATTATAAT TGCTAATCAA ATCAAAATAT AAAATTAGTA AACCAAAACCA TTTATACCCCT
TCCTTAGTAG
TCTAAAAACC GATGCTTTTA TCATATAATC TCTAATATTA ACGATTAGTT TAGTTTTATA TTTAATCAT TTGGTTTGGT AAATATGGGA
AGGAATCATC
401 TTATGGATTG TTTTTTAATG ATATTCTGTC AAACCAAAGA AAGATTGTTA TCCAGATAGA ATTTAGTTTT GATATTCATT TTTTTGTTGA
AGATTGAACG
AATACCTAAC AAAAAATTAC TATAAAGACG TTTGGTTTCT TTCTAACAAAT AGGCTATCTCT TAAATCAAAA CTATAAGTAA AAAAAACAAT
TCTAACTTGC
501 CCATATCTGG GCCTCATAAAT TCAAAAGACG GTGCCATTAT CGGTAGCCGT TCGCATTGTA CTGGATTCCA GAAATTTTAC AGTTGATGAA
TCGAAAAGAA
GGTATAGACC CGGAGTATTA AGTTTTCTGC CACGGTAATA GCCATCGCAA AGCGTAACAT GACCTAAAGT CTTTAAAGTG TCAACTACTT
AGCTTTTCTT
601 TGGTCTCATT GCAACACGTA AGGTTAAGAT GTCCCTTTTT ACCATTATAG GCAATAAATG AATCATAAAA CGACCGTATA CTGGTGAAT
AGTAGGGAGA
ACCGAGGTAA CGTTGTGCAT TCCAATCTA CAGGGAAAAA TGTAATATC CGTTATTTAC TTAGTATTTT GCTGGCATAT GACCACCTTA
TCATCCCTCT
701 ACGAGTACCT GTAGTAAAAA GTATAAATCA TAGTTAATCG GGCAATGTCC CTCGATCAAG GAGTATTGTG TCATGTTTGA GACAAACGCC
AACATTTTTG
TGCTCATGGA CATCATTTTT CATATTTAGT ATCAATTAGC CCGTTACAGG GAGCTAGTTC CTCATAACAC AGTACAAGCT CTGTTTGCCG
TTGTAAAAAA
801 TTTCTTTTGG ACAAAATGTT TTTGCATTTA TGATCCGTTA TATTTTGATC TAATGTAGAG TTGCACGTAG TTCTTACTGG CAAAGAAATC
GATGCATACC
AAAGAAAACC TGTTTACAAC AAACGTAAAT ACTAGGCAAT ATAAACTAG ATTACATCTC AACGTGCATC AAGAATGACC GTTCTTTTAG
CTACGTATGG
901 AAAAAAGAAAT AAAGGTGATA TTTGATCTTT ACCGTTTAGT TCCAACGTAA AATTGTGCCT TTGGACTTAA AATGGCGTCG TACGTCTAAC
TGATCTATCC
TTTTTTCTTA TTTCCACTAT AAACGTAGAAA TGGCAAATCA AGGTTGCATT TTAACACGGA AACCTGAATT TTACCGCAGC ATGCAGATTG
ACTAGATAGG
1001 AAAACTGAAA ATTACATTCT TGATTAGGTT TATCACAGGC AAATGTAATT TGTGGTATTT TGCCGTTCAA AATCTGTAGA ATTTTCTCAT
TGGTACACAT
TTTTGACTTT TAATGTAAGA ACTAATCCAA ATAGTGTCCG TTTACATTA ACACCATAAA ACGGCAAGTT TTAGACATCT TAAAAGAGTA
ACCAAGTAA
1101 ACAACCTGAA AATACTTTAT CTACAATCAT ACCATTCTTA TAACATGTCC CCTTAATACT AGGATCAGGC ATGAACGCAT CACAGACAAA
ATCTTCTTGA
TGTTGGACTT TTATGAAATA GATGTTAGTA TGGTAAGAAT ATTGTACAGG GGAATTATGA TCCTAGTCCG TACTTGCGTA GTGTCTGTTT
TAGAAGAACT
1201 CAAACGTAC AATTGATCCC TCCCCATCCG TTATCACAAT GACAGGTGTC ATTTTGTGCT CTTATGGGAC GATCCTTATT ACCGCTTCAT
CCGGTGATAG
GTTTGCAGTG TTAACCTAGG AGGGGTAGGC AATAGTGTTA CTGTCCACAG TAAACACGGA GAATACCCTG CTAGGAATAA TGGCGAAGTA
GGCCACTATC
1301 ACCGCCACAG AGGGGCAGAG AGCAATCATC ACCTGCAAAC CCTTCTATAC ACTCATCTC ACCAGTGTAC GAATTGCATT CAGAAAACGT
TTTGCATTCA
TGGCGGTGTC TCCCCGTCTC TCGTTAGTAG TGGACGTTTG GGAAGATATG TGAGTGTAGA TGGTACATG CTTAACGTAA GTCTTTTGAC
AAACGTAAGT
1401 AAAATAGGTA GCATACAATT AAAACATGGC GGGCATGTAT CATTGCCCTT ATCTTGTGCA GTTAGACGCG AATTTTTGCA AGAAGTACCT
TCAAAGAAATG
TTTTATCCAT CGTATGTTAA TTTTGTACCG CCCGTACATA GTAACGGGAA TAGAACACGT CAATCTGCGC TTA AAAAGCT TCTTCATGGA
AGTTTCTTAC
1501 GGGTCTTATC TTGTTTGTGA AGTACCCTG AGCAGGATAA TAATAGAAAT GATAATATAC TATAGTAGAG ATAACGTGCA TGACTTCCCA
TACTGTAATT
CCCAGAAATG AACAAAACTG TCATGGTGAC TCGTCTTATT ATTATCTTTA CTATTATATG ATATCATCTC TATTGCAGCT ACTGAAGGGT
ATGACATTAA
1601 GCCTTTAGTT GTGTATTTTT AGTGTGCAAG TTTCTGTAAA TCGATTAATT TTTTTTCTT TCCTCTTTTT ATTAACCTTA ATTTTATTT
TAGATTCCTG
CGAAAATCAA CACATAAAAA TCACACGTTT AAAGACATTT AGCTAATTA AAAAAAAGAA AGGAGAAAAA TAATTGGAAT TAAAAATAA
ATCTAAGGAC
1701 ACTTCAACTC AAGACGCACA GATATTATAA CATCTGCATA ATAGGCATT GCAAGAATTA CTCGTGAGTA AGGAAAGAGT GAGGAACTAT
CGCATACCTG
TGAAGTTGAG TTCTGCGTGT CTATAATATT GTAGACGTAT TATCCGTAAA CGTTCTTAAT GAGCACTCAT TCCTTTCTCA CTCCTTGATA
CGGTATGGAC
1801 CATTTAAAGA TGCCGATTTG GGCAGCAATC CTTTATTTT GCTTACCCTT CATACTATTA TCAGGGCCAG AAAAAAGGAG TGTTCCTCTC
CTTCTTGAAT
GTAAAATTCT ACGGCTAAAC CCGCGCTTAG GAAATAAAAC CGAAGTGGGA GTATGATAAT AGTCCCGGTC TTTTCTCTC ACAAAGGGAG
GAAGAACTTA
1901 TGATGTTACC CTCATAAAGC ACGTGGCCTC TTATCGAGAA AGAAATTACC GTCGCTCGTG ATTTGTTTGC AAAAAGAACA AAACGTAAAA
AACCCAGACA
ACTACAATGG GAGTATTTCC TGACCCGGAG AATAGCTCTT TCTTTAATGG CAGCGAGCAC TAAACAAACG TTTTCTTGT TTTGACTTTT
TTGGTCTGT
2001 CGCTCGACTT CCTGTCTTCC TATTGATTGC AGCTTCCAA TFCGTACAC AACAAAGTCC TAGCGACGGC TCACAGGTTT TGTAACAAGC
AATCGAAGGT
GCGAGCTGAA GGACAGAAGG ATAACTAACG TCGAAGGTTA AAGCAGTGTG TTGTTCCAGG ATCGCTGCCG AGTGTCCAAA ACATTGTTCG
TTAGCTTCCA
2101 TCTGGAATGG CGGGAAGGG TTTAGTACCA CATGCTATGA TGCCACTGT GATCTCCAGA GCAAAGTTCC TTCGATCGTA CTGTTACTCT
CTCTCTTCA
AGACCTTACC GCCCTTCC CAAATCATGGT GTACGATACT ACGGGTGACA CTAGAGGTCT CGTTTCAAGC AAGCTAGCAT GACAATGAGA
GAGAGAAAGT
```

2201 AACAGAATTG TCCGAATCGT GTGACAACAA CAGCCTGTTT TCACACACTC TTTTCTTCTA ACCAAGGGGG TGGTTTAGTT TAGTAGAAC  
TCGTGAAACT  
TTGTCTTAA AGGCTTAGCA CACTGTTGTT GTCGGACAAG AGTGTGTGAG AAAAGAAGAT TGGTTCCCCC ACCAAATCAA ATCATCTTGG  
2301 AGCACTTTGA  
TACATTTACA TATATATAAA CTTGCATAAA TTGGTCAATG CAAGAAATAC ATATTTGGTC TTTTCTAATT CGTAGTTTTT CAAGTCTTTA  
GATGCTTTCT  
ATGTAATGT ATATATATTT GAACGTATTT AACCAAGTTAC GTTCTTTATG TATAAACCCAG AAAAGATTA GCATCAAAAA GTTCAAGAAT  
2401 CTACGAAAAGA  
TTTTCTCTTT TTTACAGATC ATCAAGGAAG TAATTATCTA CTTTTTACAA CAAATATAAA ACCAAAAGAT CAAGTCGACA TGTTCGCTTT  
CTACTTTCTC  
AAAAGAGAAA AAATGCTAG TAGTTCCTTC ATTAATAGAT GAAAAATGTT GTTTATATTT TGGTTTTCTA GTTCAGCTGT ACAAAACGAAA  
2501 GATGAAAGAG  
ACCGCATGCA TCAGTTTGAA GGGCGTTTTT GGGGTGTCTC CGAGTTACAA TGGCCTTGGT CTCACTCCAC AGATGGGTTG GGACAACCTGG  
AATACGTTTG  
TGGCGTACGT AGTCAAACCT CCCGCAAAAA CCCACAGAG GCTCAATGTT ACCGGAACCA GAGTGAGGTG TCTACCCAAC CCTGTTGACC  
TTATGCAAA  
2601 CCTGCGATGT CAGTGAACAG CTACTTCTAG ACACCGCTGA TAGAATTTCT GACTTGGGGC TAAAGGATAT GGTTTACAAG TATATCATTC  
TGGATGACTG  
GGACGCTACA GTCACTTGTG GATGAAGATC TGTGGCGACT ATCTTAAAGA CTGAACCCCG ATTTCTTATA CCAATGTTC ATATAGTAAG  
ACCTACTGAC  
2701 CTGGTCTAGC GGCAGAGATT CCGACGGTTT CCTCGTTGCA GATGAACAAA AATTTCCCAA TGGTATGGGC CATGTTGCG ACCACCTGCA  
TAATAACAGC  
GACCAAGATCG CCGTCTCTAA GGCTGCCAAA GGAGCAACGT CTACTTGTTT TTAAGGGGT ACCATACCCG GTACAACGTC TGGTGGACGT  
ATTATTGTCG  
2801 TTTCTTTTCG GTATGTATTG GTCTGCTGGT GAGTACACCT GTGCTGGATA TCCTGGGTCT CTGGGTCTGT AGGAAGAAGA TGCACAGTTC  
TTTGCAATA  
AAAGAAAAGC CATAkataAG CAGACGACCA CTCATGTGGA CACGACCTAT AGGACCCAGA GACCCAGCAC TCCTTCTTCT ACGTGTCAAG  
AAACGTTTAT  
2901 ACCGCGTTGA CTACTTGAAG TACGATAATT GTTACAATAA GGTCAGTTT GGTACACCCG AAATTTCTTA CCACCGTTAC AAGGCCATGT  
CAGATGCTTT  
TGGCGCAACT GATGAACTTC ATGCTATTAA CAATGTTATT CCCAGTCAA CCATGTGGCC TTTAAAGAA GGTGGCAATG TTCGGTACA  
GTCTACGAAA  
3001 GAATAAACT GGTAGCCTA TATTCTATTC TCTATGTAAC TGGGGTCAGG ATTTAACATT TTAAGGGGC TCTGGTATCG CCAATCTTG  
GAGAAATGAGT  
CTTATTTTGA CCATCCGGAT ATAAGATAAG AGATACATTG ACCCAGTCC TAAATGTAA AATGACCCCG AGACCATAGC GGTAAAGAAC  
CTCTTACTCA  
3101 GGAGATGTTA CTGCTGAGTT CACTCGTCCA GATAGCAGAT GTCCCTGTGA TGGCGATGAA TACGATTGCA AGTACGCCGG TTTCCATTGT  
TCTATTATGA  
CCTCTACAAT GACGACTCAA GTGAGCAGGT CTATCGTCTA CAGGGACACT ACCGCTACTT ATGCTAACGT TCATGCGGCC AAAGTAAACA  
AGATAAATACT  
3201 ATATTTTAA CAAGGACGCT CCAATGGGGG GATCCCCGGG TTAATTAAGG CGCGCCAGAT CTGTTTAGCT TGCCCTGCTC CCGCCGGTTC  
ACCCGCGCCAG  
TATAAGAATT GTTCCGTCGA GGTTACCCCC CTAGGGGCC AATTAATTC CGCGGTCTA GACAAATCGA ACGGAGCAGG GCGGCCAG  
TGGGCGGTC  
3301 CGACATGGAG GCCCAGAATA CCCTCCTTGA CAGTCTTGAC GTGCGCAGCT CAGGGGCATG ATGTGACTGT CGCCCGTACA TTTAGCCCAT  
ACATCCCCAT  
GCTGTACCTC CGGGTCTTAT GGGAGGAACT GTCAGAACTG CACGCGTCGA GTCCCCGTAC TACTACTGACA GCGGGCATGT AAATCGGGTA  
TGTAGGGGTA  
3401 GTATAATCAT TTGCATCCAT ACATTTTGAT GGCCGACCGG CGCGAAGCAA AAATTACGGC TCCTCGTGC AGACCTGCGA GCAGGGAAAC  
GCTCCCTCA  
CATATTAGTA AACGTAGGTA TGTAATACTA CCGGCGTCC GCGCTTCTGT TTTAATGCCG AGGAGCGACG TCTGAGCCTT CGTCCCTTTG  
CGAGGGGAGT  
3501 CAGACGCGTT GAATGTGCC CACGCGCGC CCCTGTAGAG AAATATAAAA GGTTAGGATT TGCCACTGAG GTTCTTCTTT CATATACTTC  
CTTTTAAAT  
GTCTGCGCAA CTTAACAGGG GTGCGGCGCG GGGACATCTC TTTATATTTT CCAATCTTAA ACGGTGACTC CAAGAAGAAA GTATATGAAG  
GAAAATTTTA  
3601 CTTGCTAGGA TACAGTTCTC ACATCACATC CGAACATAAA CAACCATGGG TAAGGAAAAG ACTCACGTTT CGAGGCCGCG ATTAATTTCC  
AACATGGATG  
GAAACGATCCT ATGTCAAAGG TGTAAGTGTAG GCTTGTATTT GTTGGTACC ACCCTTTTTC TGAGTGCAA GCTCCGCGCG TAATTTAAGG  
TTGTACCTAC  
3701 CTGATTTATA TGGGTATAAA TGGGCTCGCG ATAATGTGCG GCAATCAGGT GCGACAATCT ATCGATTGTA TGGGAAGCCC GATGCGCCAG  
AGTTGTTTCT  
GACTAAATAT ACCCATATTT ACCCGAGCGC TATTACAGCC CGTTAGTCCA CGCTGTTAGA TAGCTAACAT ACCCTTCGGG CTACGCGGTC  
TCAACAAAAG  
3801 GAAACATGGC AAAGGTAGCG TTGCCAATGA TGTACAGAT GAGATGGTCA GACTAAACTG GCTGACGGAA TTTATGCCTC TTCGACCAT  
CAAGCATTTT  
CTTTGTACCG TTTCCATCGC AACGGTTACT ACAATGTCTA CTCTACCAGT CTGATTTGAC CGACTGCCTT AAATACGGAG AAGGCTGGTA  
GTTGTAATAA  
3901 ATCCGTACTC CTGATGATGC ATGGTTACTC ACCACTGCGA TCCCAGCAA AACAGCATT CAGGTATTAG AAGAAATATCC TGATTAGGTT  
GAAAATATTG  
TAGGCATGAG GACTACTACG TACCAATGAG TGGTGACGCT AGGGCCGTT TGTGCGTAAG GTCCATAATC TTCTTATAGG ACTAAGTCCA  
CTTTTATAAC  
4001 TTGATGCGCT GGCAGTGTTC CTGCGCCGGT TGCATTGAT TCCTGTTTGT AATGTGCTT TTAACAGCGA TCGCGTATTT CGTCTCGCTC  
AGGCGCAATC  
AACTACGCGA CCGTCAACAG GACGCGCCA ACGTAAGCTA AGGACAAACA TTAACAGGAA AATTGTCGCT AGCGCATAAA GCAGAGCGAG  
TCCGCGTTAG  
4101 ACGAATGAAT AACGGTTTGG TTGATGCGAG TGATTTTGTAG GACGAGCGTA ATGGCTGGCC TGTGAAACAA GTCTGAAAAG AAATGCATAA  
GCTTTTGCCA  
TGCTTACTTA TTGCCAAACC AACTACGCTC ACTAAAATA CTGCTCGCAT TACCGACCGG ACAACTTGTG CAGACCTTTC TTTACGTATT  
CGAAAACGGT  
4201 TTCTCACCGG ATTCAGTCGT CACTCATGGT GATTTCTCAC TTGATAACCT TATTTTGTGAC GAGGGGAAAT TAATAGGTTG TATTGATGTT  
GGACGAGTCG  
AAGAGTGGCC TAAGTACAGCA GTGAGTACCA CTAAGAGGTG AACTATTGGA ATAAAAACTG CTCCCCTTTA ATTATCCAAC ATAACTACAA  
CCTGCTCAGC  
4301 GAATCGCAGA CCGATACAG GATCTTGCCA TCCTATGAAA CTGCTCGGTT GAGTTTCTC CTTCATTACA GAAACGGCTT TTTCAAAAA  
ATGGTATTGA  
CTTAGCGTCT GGCTATGGTC CTAGAACGGT AGGATACCTT GACGAGCCA CTCAAAAGAG GAAGTAATGT CTTTGCCGAA AAAGTTTTTA  
TACCATAACT  
4401 TAATCCTGAT ATGAATAAAT TGCAGTTTCA TTTGATGCTC GATGAGTTTT TCTAATCAGT ACTGACAATA AAAAGATTCT TGTTCCTAAG  
AACTTGTGAT  
ATTAGGACTA TACTTATTTA ACGTCAAAGT AAACACTAGG CTAATAAAA AGATTAGTCA TGACTGTTAT TTTTCTAAGA ACAAAAGTTC  
TTGAACAGTA

4501 TTGTATAGTT TTTTATATT GTAGTTGTTT TATTTTAAATC AAATGTTAGC GTGATTTATA TTTTTTTTCG CCTCGACATC ATCTGCCAG  
ATGCGAAGTT AACATATCAA AAAAATATAA CATCAACAAG ATAAAAATTAG TTTACAATCG CACTAAATAT AAAAAAAGC GGAGCTGTAG TAGACGGGTC  
4601 TACGGTTCAA AAGTCCGCAG AAAGTAATAT CATGCGTCAA TCGTATGTGA ATGCTGGTGC CTATACTGCT GTCGATTGCA TACTAACGCC GCCATCCAGT  
GTCGAAAACG TTCACGCGTC TTTCATTATA GTACGCAAGT AGCATACTACT TACGACCAGC GATATGACGA CAGCTAAGCT ATGATTGCGG CGGTAGGTCA  
CAGCTTTTGC AGCTCAGACC ACCTGCATAA TAACAGCTTT CTTTTCGGTA TGTATTCTGC TGCTGGTGAG TACACCTGTG CTGGATATCC TGGGTCTCTG  
4701 GGTCTGAGG TCGAGTCTGG TGGACGTATT ATTGTCGAAA GAAAAGCCAT ACATAAGCAG ACGACCCTC ATGTGGACAC GACCTATAGG ACCCAGAGAC  
CCAGCACTCC AAGAAGATGC ACAGTTCTTT GCAAATAACC GCGTTGACTA CTGGAAGTAC GATAATTGTT ACAATAAGGG TCAGTTTGGT ACACCGGAAA  
4801 TTTCTTACCA TTCTTCTAGC TGTCAGAAA CGTTTATTGG CGCAACTGAT GAACTTCATG CTATTAACAA TGTATTCCCG AGTCAAACCA TGTGGCCTTT  
AAAGAATGGT CCGTTTACAAG GCCATGTCAG ATGCTTTGAA TAAAAGTGGT AGGCCTATAT TCTATTCTCT ATGTAACCTGG GGTCAAGGATT TAACATTTTA  
4901 CTGGGGCTCT GGCAATGTTT CGGTACAGTC TACGAAACTT ATTTTGACCA TCCGGATATA AGATAAGAGA TACATTGACC CCAGTCTTAA ATTGTAAAAA  
GACCCCGAGA GGTATCGCCA ATCTTTGGAG AATGAGTGGG GATGTTACTG CTGAGTTCAC TCGTCCAGAT AGCAGATGTC CCTGTGATGG CGATGAATAC  
5001 GATTGCAAGT CCATAGCGGT TAAGAACCCT TTAAGTCACT CTACAATGAC GACTCAAAGT AGCAGGTTCTA TCGTCTACAG GGACACTACC GCTACTTATG  
CTAACGTTCA ACACCTGATA ACATCTAGA TCGCGCCAAA GGTAACAAGA TAATACTTAT AAGAATTGTT CCGTCGAGGT TACCCCGTTT TACGTCCACA ACCACCAACC TTAAGTACC  
5101 TGTAGATCT GGTGGTGTCT GGAATTTGA CTGACGATGA GAAAAAGGCA CATTCTCTA TGTGGGCAAT GGTAAGGCTC CCACTTATCA TTGGTGCCAA  
GTTTGGTGTCT TGTGAATAAC CCAACCCACAG CCCTTAAACT GACTGCTACT CCTTTTCCGT GTAAGAGAT ACACCCGTTA CCATTTTACA GGTGAATAGT AACCCAGGTT  
5201 ACACCTTATG TTAAGGCAT CTTCGTA CTCTATAGT CAAGCCTCTG TCATCGCAAT TAATCAAGAT TCAATGGTA TTCCAGCAAC AAGAGTCTGG  
AGATATTATG AATTTCCGTA GAAGCATGAG TTAGATATCA GTTCGGAGAC AGTAGCGTTA ATTAGTTCTA AGTTTACCAT AAGGTGTTG TTCTCAGACC  
5301 TCTATAATAC TTTACAGACAG AGATGAATAT GGACAAGGTC AAAATCAAAT GTGGAGTGGT CCTCTTGACA ATGGTGATCA AGTGGTGTG TTATTGAATG  
GAGGAAGCGT AAAGTCTGTG TCTACTTATA CCTGTTCCAC TTTAAGTTTA CACCTCACCA GGAGAACTGT TACCACTAGT TCACCAACGA AATAACTTAC  
5401 CTCCTTGCCA ATCTAGACCA ATGAACACGA CCTTGGAAGA GATTTTTTTT GACAGCAATC TGGGTTCAA GAAACTGACA TCGACTTGGG ATATCTACGA  
CCTATGGGCC TAGATCTGGT TACTTGTGCT GGAACCTTCT CTAAAAAATA CTGTCGTTAG ACCCAAGTTT CTTTGACTGT AGCTGAACCC TATAGATGCT  
5501 GGATACCCGG AACAGAGTTG ACAACTCGAC AGCGTCTGCT ATCCTTGAGC GGAATAAGAC AGCCACCGGT ATTCTCTACA ATGCTACGGA GCAATCCTAC  
AAAAGACGGTT TTGTCTCAAC TGTGAGCTG TCGCAGACGA TAGGAACCTG CTTATTCTG TCGGTGGCCA TAAGAGATGT TACGATGCTC CGTTAGGATG  
5601 TTTCTGCCAA TGCTAAGAAA TGATAACAAGA CTGTTGGTCT AGAAAAATGG TAGTCTTTCT CCAATGCTA TACTTAAAC GACTGTTCCA GCTCACGGTA  
5701 TCGCCTTCTA ACAGATTCTT ACTATGTTCT GACAAACCAG TCTTTTAAAC ATCAGAAAAGA GGTTTACGAT ATGAATTGTG CTGACAGGTT CGAGTGCCAT  
AGCGGAAGAT TAGGTTGAGA CCCTCTTCTT GAGCTTATTG TTGAGCAAAAG CAGGGCGAGA AGTATTGATG ATTGTTAAAA AGTTCATGAA AAAAAACTA  
5801 CTCGAATATT ATCCAACCTCT GGGAGAAGAA CTCGAATAAC AACTCGTTTC GTCCGCTCTC TCATAACTAC TAACAATTTT TCAAGTACTT TTTTATGAT  
GAGCTTATAA TATTACAGAT AACTAAATAA TAAACGACAG AATAGCCTAT CAGGTATTCC AATAGTTTTC GTTTGTAGG TACATAATCT GAAGCCCTTG  
5901 AACTTTTCTC ATAAGTCTCA TTGATTTATT ATTTGCTGTC TTATCGGATA GTCCATAAGG TTATCAAAG CAAAACATCC ATGTATTAGA CTTGCGGAAC  
6001 TTGAAAAGA CGTTTACATA CTTTATTGCA TTAGCGATAT TTCACATGTG CTATACTAGT GACTTTTGTG AAATACTTTT CTGCCAATGT GATTCTAGAA  
TGATATGACA GCAAATGTAT GAAGTAACGT AATCGCTATA AAGTGTACAC GATATGATCA CTGAAAACAT TTTATGAAAA GACGGTTACA CTAAGATCTT  
6101 AACATACTGT TTTACGAAAG AGGAACAACA GCTTCAGGAG TACATACAAA CGACGAAATC ATCATATCAG CAAAACCGGA TATCGAAGAA GCAGAAGGCG  
CTAGTCTACA AAAGTCTTCT TCCTTGTGTT CGAAGTCTC ATGTATGTTT GCTGCTTTAG TAGTATAGTC GTTTTGGCCT ATAGCTTCTT CGTCTCCGC  
6201 GATCAGATGT GGTATCTCTG TAGTTGATAC AAACAAAAAC AAAGAGTTCG AACACATTTT TGGGTCCCGA GTAGTGGCGT TGGTGTTCCTA CCATTGGTCTG  
AACAAATGTT CCATAGAGAC ATCAACTATG TTTGTTTTTG TTTCTCAAGC TTGTGTAAGG ACCCAGGGCT CATCACCGCA ACCACAAGGT GGTAAACGAC  
6301 TTGTTAACAA TTTTGTCTAC GCTCGCTCAT AGCCGGTTTC AGTAAAAATT AAGTAAGCCC AGTTTCTATC GAATTTGAGA ATAGGGTCTA AAAAGGGAGT  
ATCACCATCG AAAACGATGG CGAGCGAGTA TCGGCCAAAG TCATTTTAAAC TTCATTCTGG TCAAAGTAGA CTTAAACTCT TATCCAGAT TTTTCCCTCA  
TAGTGGTAGC AACGCTTCTT GATAGTCCTT AGAGAACAGT CATCAGATGT CCATATATTA CTAATACCCT TCTAGACCTG ACCACGTACT GTTGGATGCA  
6401 TTGGTACCAA TTGCGAAGGA CTATCAGGAA TCTCTGTGCA GTAGTCTACA GGTATATAAT GATGATGGGA AGATCTGGAC TGGTGCATGA CAACCTACGT  
AACCATGGTT TTTTGGCCCG AATTCTTGGG GGAACAACCT CACAGAATGT TTTGTCATAT TGTCGAAGTG GTCACAAAAA AAGAGAAGTT CCGCCAATTA  
6501 TAAAAAGGGA AAAAAAGGGG TTAAGGACCC CCTTGTGAA GTGCTTTACA AAACAGTATA ACAGCTTCTC CAGTGTTTTG TTCTCTTCAA GGCAGTTAAT  
ATTTTCCCTC ACCCGTATAT TTCAGTTTCA CGGATGATTT CCAGGGTGGAG AGTACTGTAT ATGGGCTTAC GATAGAAGGC CATAAAAAAT TCTTGCTTGG  
6601 CAACAAAAATA TGGGCATATA AAGTCGAAGT GCCTACTAAA GGTCCCACTC TCATGACATA TACCCGAATG CTATCTTCCG GTATTTTTAA AGAACGAACC  
GTTGTTTTAT GAAGTGAAGT CATGTCGAGG CTGCTGTGTG GGAAGACAGC TTAATAATAT CAAAAAAAAG AATCTAAAAA ACTGTGTGTC TTGTCACAGA  
6701 AAGGGAATCA TTCACTTTA GTACAGCTCC GACGACACAC CCTCTTGTG AATTTTTATG TGTTTTTTTC TTAGATTTTG TGACACAACG AACAGGGTCT  
TTCCTTAGT



6801 AGTATTTTTA TAAAGATTGG AGTGGTAAAA ATCGAGTATG TGCTAGATGC TATGGAAGAT ACAAATTCAG CGGTCATCAC TGTATAAATT  
GCAAGTATGT  
TCATAAAAAA ATTTCTAACC TCACCATTTT TAGCTCATAC ACGATCTACG ATACCTTCTA TGTTTAAGTC GCCAGTAGTG ACATATTTAA  
CGTTCATACA  
6901 ACCAGAAGCA CGTGAAGTGA AAAAGGCAAA AGACAAAGGC GAAAAATTGG GCATTACGCC CGAAGGTTTG CCAGTTAAAG GACCAGAGTG  
TATAAAATGT  
TGGTCTTCGT GCACTTCACT TTTTCGGTTT TCTGTTTCCG CTTTTTAAAC CGTAATGCGG GCTTCCAAAC GGTCATTTTC CTGGTCTCAC  
ATATTTTACA  
7001 GGCGGAATCT TACAGTGGCC TATGCGGCCG CTCTAGAACT AGTGGATCGA TCCCCAATTC GCCCTATAGT GAGTCGTATT ACAATTCACT  
GGCCGTCGTT  
CCGCCTTAGA ATGTACACCG ATACGCCGGC GAGATCTTGA TCACCTAGCT AGGGGTTAAG CGGGATATCA CTCAGCATAA TGTTAAGTGA  
CCGGCAGCAA  
7101 TTACAACGTC GTGACTGGGA AAACCCTGGC GTTACCCAAC TTAATCGCCT TGCAGCACAT CCCCCTTTCG CCAGCTGGGC TAATAGCGAA  
GAGGCCGCA  
AATGTTGCAG CACTGACCCCT TTTGGGACCG CAATGGGTTG AATTAGCGGA ACGTCGTGTA GGGGAAAGC GGTGACCCG ATTATCGCTT  
CTCCGGGGCT  
7201 CCGATCGCCG TCCCAAACAG TTGCGCAGCC TGAATGGCGA ATGGCGCCTG ATGCGGTATT TTCTCCTTAC GCATCTGTGC GGTATTTTAC  
ACCCGCATAC  
GGCTAGCGGG AAGGGTTGTG AACCGTCGCG ACTTACCGCT TACCGCGGAC TACGCCATAA AAGAGGAATG CGTAGACACG CCATAAAGTG  
TGGCGTATGC  
7301 TCAAAGCAAC CATAGTACGC GCCCTGTAGC GCGCATTA A GCGCGCGGG TGTGGTGGTT ACGCGCAGCG TGACCCGTAC ACTTGCCAGC  
GCCCTAGCGC  
AGTTTTCGTT GTATCATGCG CGGGACATCG CCGCGTAATT CCGCGCCGCC ACACCACCAA TGCGCGTGC ACTGGCGGATG TGAACGGTGC  
CGGGATCGCG  
7401 CCGCTCCTTT CGTTCCTTC CTTTCCTTTC TCGCCACGTT CCGCGGCTTT CCCCCTCAAG CTCTAAATCG GGGTGGGCCA TCGCCCTGAT  
AGACGGTTTT  
GGCGAGGAAA GCGAAAGAAG GGAAGGAAAG AGCGGTGCAA GCGGCCGAAA GGGGCAGTTC GAGATTTAGC CCCACCCGGT AGCGGGACTA  
TCTGCCAAAA  
7501 TCGCCCTTTC ACGTTGGAGT CCACGTTCTT TAATAGTGGG CTCTGTTCAC AAACCTGGAAC AACACTCAAC CCTATCTCGG GCTATTTCTT  
TGATTTATAA  
AGCGGGA AAC TGCAACCTCA GGTGCAAGAA ATTATCACCT GAGAACAAGG TTTGACCTTG TTGTGAGTTG GGATAGAGCC CGATAAGAAA  
ACTAAATATT  
7601 GGGATTTTGC CGATTTTCGG CTATTGGTTA AAAAATGAGC TGATTTAACA AAAATTTAAC GCGAATTTTA ACAAATATT AACGTTTACA  
ATTTTATGGT  
CCCTAAAACG GCTAAAGCCG GATAACCAAT TTTTACTCG ACTAAATGT TTTTAAATG CGCTTAAAAA TGTTTATAA TTGCAAATGT  
TAAAAATCCA  
7701 GCACCTCTCAG TACAATCTGC TCTGATGCGC CATAGTTAAG CCAGCCCCGA CACCCGCCAA CACCCGCTGA CGCGCCCTGA CGGGCTTGTC  
TGCTCCGGCC  
CGTGAGAGTC ATGTTAGACG AACTACGGC GTATCAATTC GGTGCGGGCT GTGGGCGGTT GTGGGCGACT GCGCGGGACT GCCCGAACAG  
ACGAGGGCCG  
7801 ATCCGCTTAC AGACAAGCTG TGACCGTCTC CCGGAGCTGC ATGTGTCAGA GGTTTTCACC GTCATCACCC AAACGCGCGA GACGAAAGGG  
CCTCGTGATA  
TAGGCGAATG TCTGTTTCGAC ACTGGCAGAG GCCCTCGACG TACACAGTCT CCAAAGTGG CAGTAGTGGC TTTGCGCGCT CTGTTTCC  
GGAGCACTAT  
7901 CGCCTATTTT TATAGTTAA TGTCATGATA ATAATGGTTT CTTAGACGTC AGGTGGCACT TTTCCGGGAA ATGTGCGCGG AACCCCTATT  
TGTTTATTTT  
GCGGATAAAA ATATCCAATT ACAGTACTAT TATTACCAA GAATCTGCGA TCCACCGTGA AAAGCCCCTT TACACGCGCC TTGGGGATAA  
ACAAATAAAA  
8001 TCTAAATACA TTCAAATATG TATCCGCTCA TGAGACAATA ACCCTGATAA ATGCTTCAAT AATATTGAAA AAGGAAGAGT ATGAGTATTC  
AACATTTCCG  
AGATTTATGT AAGTTTATAC ATAGGCGAGT ACTCTGTATT TGGGACTATT TACGAAGTTA TTATAACTTT TTCCTTCTCA TACTCATAAG  
TGTAAAGGC  
8101 TGTCGCCCTT ATTCCCTTTT TTGCGGCATT TTGCCCTTCT GTTTTGTCTC ACCCAGAAAC GCTGGTGAAA GTAAAAGATG CTGAAGATCA  
GTTGGGTGCA  
ACAGCGGGAA TAAGGGA AAA AACCGGTAA AACGGAAGGA CAAAAACGAG TGGGTCTTTG CGACCACCTT CATTTTCTAC GACTTCTAGT  
CAACCCACGT  
8201 CGAGTGGGTT ACATCGAACT GGATCTCAAC AGCGGTAAGA TCCTTGAGAG TTTTCGCCCC GAAGAACGTT TTCCAATGAT GAGCACTTTT  
AAAGTTCTGC  
GCTCACCCAA TGTAGCTTGA CCTAGAGTTG TCGCCATCTC AGGAACTCTC AAAAGCGGGG CTTCTTGCAA AAGGTTACTA CTCGTGAAAA  
TTTCAAGACG  
8301 TATGTTGGCG GGTATTATCC CGTATTGACG CCGGGCAAGA GCAACTCGGT CCGCCGATAC ACTATTCTCA GAATGACTTG GTTGGTACT  
CACCAGTCAC  
ATACACCCGC CCATAATAGG GCATAACTGC GGCCGTTCT CGTTGAGCCA GCGGCGTATG TGATAAGAGT CTTACTGAA CAACTCATGA  
GTGGTCAGTG  
8401 AGAAAAGCAT CTTACGGATG GCATGACAGT AAGAGAATTA TGCAAGTCTG CCATAACCAT GAGTGATAAC ACTGCGGCCA ACTTACTTCT  
GACAAACGATC  
TCTTTTCGTA GAATGCCTAC CGTACTGTCA TTCTCTTAAT ACGTACGAC GGTATTGGTA CTCACTATTG TGACGCGGTT TGAATGAAGA  
CTGTTGCTAG  
8501 GGAGGACCGA AGGAGCTAAC CGCTTTTTTG CACAACATGG GGGATCATGT AACTCGCCTT GATCGTTGGG AACCGGAGCT GAATGAAGCC  
ATACCAAACG  
CCTCCTGGCT TCCTCGATTG GCGAAAAAAC GTGTTGTACC CCCTAGTACA TTGAGCGGAA CTAGCAACCC TTGGCCTCGA CTTACTTCGG  
TATGGTTTGC  
8601 ACGAGCGTGA CACCACGATG CCTGTAGCAA TGGCAACAAAC GTTGCAGCAA CTATTAACCTG GCGAACTACT TACTCTAGCT TCCCGGCAAC  
AATTAATAGA  
TGCTCGCACT GTGGTGTAC GGACATCGTT ACCGTTGTGT CAACGCGTTT GATAATTGAC CGCTTGATGA ATGAGATCGA AGGCGCGTTG  
TTAATTATCT  
8701 CTGGATGGAG GCGGATAAAG TTGACGAGAC ACTTCTGCGC TCGGCCCTTC CGGCTGGCTG GTTTATTGCT GATAAATCTG GAGCCGGTGA  
GCGTGGGTCT  
GACCTACCTC CGCCTATTTT AACGTCCTGG TGAAGACGCG AGCCGGGAAG GCCGACCGAC CAAATAACGA CTATTTAGAC CTCGGCCACT  
CGCACCAGA  
8801 CGCGGTATCA TTGCAGCACT GGGGCCAGAT GGTAAAGCCCT CCCGTATCGT AGTTATCTAC ACGACGGGA GTCAGGCAAC TATGGATGAA  
CGAAAATAGAC  
GCGCCATAGT AACGTCGTGA CCCCCTGCTA CCATTCGGGA GGGCATAGCA TCAATAGATG TGCTGCCCTT CAGTCCGTTG ATACCTACTT  
GCTTTATCTG  
8901 AGATCGCTGA GATAGGTGCG TCACTGATTA AGCATTGGTA ACTGTGACAG CAAGTTTACT CATATATACT TTAGATTGAT TTAACCTTCT  
ATTTTAAAT  
TCTAGCGACT CTATCCACGG AGTGACTAAT TCGTAACCAT TGACAGTCTG GTTCAAATGA GTATATATGA AATCTAATA AATTTTGAAG  
TAAAAATTA  
9001 TAAAAGGATC TAGGTGAAGA TCCTTTTGA TAATCTCATG ACCAAAATCC CTTAACGTGA GTTTTCGTTT CACTGAGCGT CAGACCCCGT  
AGAAAAGATC  
ATTTTCTTAG ATCCACTTCT AGGAAAAACT ATTAGAGTAC TGTTTTTAGG GAATTGCACT CAAAAGCAAG GTGACTCGCA GTCTGGGGCA  
TCTTTTCTAG

9101 AAAGGATCTT CTTGAGATCC TTTTTTCTG GCGGTAATCT GCTGCTTGCA AACAAAAAAA CCACCGCTAC CAGCGGTGGT TTGTTTGCCG  
GATCAAGAGC  
TTTCTAGAA GAACTCTAGG AAAAAAAGAC GCGCATTAGA CGACGAACGT TTGTTTTTTT GGTGGCGATG GTCGCCACCA AACAAACGGC  
CTAGTTCTCG  
9201 TACCAACTCT TTTTCCGAAG GTAAGTGGCT TCAGCAGAGC GCAGATACCA AATACTGTCC TTCTAGTGA GCCGTAGTTA GGCCACCACCT  
TCAAGAACTC  
ATGGTTGAGA AAAAAGCTTC CATTGACCGA AGTCGTCTCG CGTCTATGGT TTATGACAGG AAGATCACAT CGGCATCAAT CCGGTGGTGA  
AGTTCTTGAG  
9301 TGTAGCACCG CCTACATACC TCGCTCTGCT AATCCTGTTA CCAGTGGCTG CTGCCAGTGG CGATAAGTCG TGTCTTACC GGTGGACTC  
AAGACGATAG  
ACATCGTGGC GGATGTATGG AGCGAGACGA TTAGGACAAAT GGTCCACCGC GACGGTCACC GCTATTACG ACAGAATGGC CCAACCTGAG  
TTCTGCTATC  
9401 TTACCGGATA AGGCGCAGCG GTCGGGCTGA ACGGGGGGTT CGTGACACACA GCCCAGCTTG GAGCGAACGA CCTACACCGA ACTGAGATAC  
CTACAGCGTG  
AATGGCCTAT TCCGCGTCGC CAGCCCGACT TGCCCCCAA GCACGTGTGT CGGGTCGAAC CTCGCTTGCT GGATGTGGCT TGACTCTATG  
GATGTCGCAC  
9501 AGCATTGAGA AAGCGCCACG CTTCCGAAG GAGAAAGGC GGACAGGTAT CCGGTAAGCG GCAGGGTCGG AACAGGAGAG CGCACGAGGG  
AGCTTCCAGG  
TCGTAACCTCT TTCGCGGTGC GAAGGGCTTC CCTCTTTCCG CTTGTCCATA GGCCATTTCG CGTCCCAGCC TTGTCTCTC CGTGCTCTCC  
TCGAAGGTCC  
9601 GGGAAACGCC TGGTATCTTT ATAGTCTGT CCGGTTTCGC CACCTCTGAC TTGAGCGTCG ATTTTTGTGA TGCTCGTCAG GGGGGCGGAG  
CCTATGGAAA  
CCCTTTGCGG ACCATAGAAA TATCAGGACA GCCCAAAGCG GTGGAGACTG AACTCGCAGC TAAAAAACT ACAGAGCAGTC CCCCCGCTC  
GGATACCTTT  
9701 AACGCCAGCA ACGCGCCCTT TTTACGGTTC CTGGCCTTTT GCTGGCCTTT TGCTCACATG TTCTTTCTG CGTTATCCCC TGATTCTGTG  
GATAACCGTA  
TTGCGGTCTG TGCGCCGAA AAATGCCAAG GACCGGAAAA GCACCGGAAA ACGAGTGTAC AAGAAAGGAC GCAATAGGG ACTAAGACAC  
CTATTGGCAT  
9801 TTACCGCCTT TGAGTGAGCT GATACCGCTC GCCGCAGCCG AACGACCGAG CGCAGCGAGT CAGTGAGCGA GGAAGCGGAA GAGCGCCCAA  
TACGCAACC  
AATGGCGGAA ACTCACTCGA CTATGGCGAG CGGCGTGGC TTGCTGGCTC GCGTCGCTCA GTCACTCGCT CCTTCGCCTT CTCGCGGGTT  
ATGCGTTTGG  
9901 GCCTCTCCCC GCGCGTTGGC CGATTATTA ATGCAGCTGG CACGACAGGT TTCCCGACTG GAAAGCGGGC AGTGAGCGCA ACGCAATTAA  
TGTGAGTTAG  
CGGAGAGGGG CGCGCAACCG GCTAAGTAAT TACGTCGACC GTGCTGTCCA AAGGGCTGAC CTTTCGCCCC TCACTCGCGT TGCCTTAATT  
ACACTCAATC  
10001 CTCACTATT AGGCACCCCA GGCTTTACAC TTTATGCTTC CGCGGCTCGT ATGTTGTGTG GAATTGTGAG CGGATAACAA TTTACACAG  
GAAACAGCT  
GAGTGAGTAA TCCGTGGGGT CCGAAATGTG AAATACGAAG GCGCCGAGCA TACAACACAC CTTAACACTC GCCTATTGTT AAAGTGTGTC  
CTTTGTCGA

**Supplementary Figure 4: Vector map and full DNA/amino acid sequence of the ZFNs used for *golden* gene disruption.**

Vector map (sequence shown on next page):

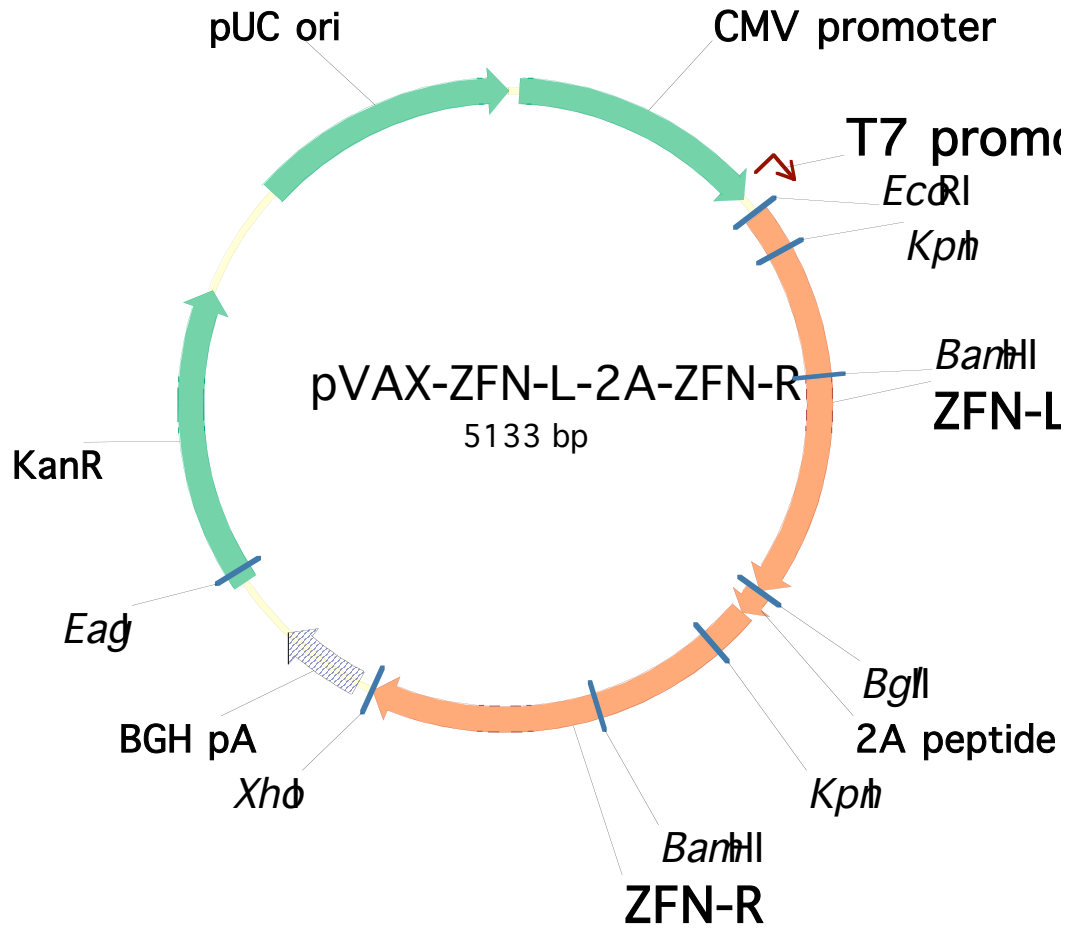

ZFN expression vector sequence

- 1) The ZFP DNA binding helices are shown in lower case and underlined.
- 2) The 2A peptide sequence is double-underlined.
- 3) The Eag I restriction site and the T7 promoter used to linearize the plasmid and drive mRNA transcription, respectively, are indicated.

**golden pair 1**

CTGGCTAACTAGAGAACCCACTGCTTACTGGCTTATCGAAATTAATACGACTCACTATAG  
*T7 promoter*

GGAGACCCAAGCTGGCTAGCGTTTAACTTAAGCTGATCCACTAGTCCAGTGTGGTGAA

M D Y K D H D G D Y K D H D I D Y K  
TTCGCCATGGACTACAAAGACCATGACGGTGATTATAAAGATCATGACATCGATTACAAG

D D D D K M A P K K K R K V G I H G V P  
GATGACGATGACAAGATGGCCCCAAGAAGAAGAGGAAGGTGGGCATTACGGGGTACCC  
*Kpn I*

**ZFP-L**

A A M A E R P F Q C R I C M R N F S t s  
GCCGCTATGGCTGAGAGGCCCTTCCAGTGTCTGAATCTGCATGCGTAACTTCAGTACCTCC

g s l s r H I R T H T G E K P F A C D I  
GGCTCCCTGTCCCGCCACATCCGCACCCACACAGGCGAGAAGCCTTTTGCCTGTGACATT

C G R K F A r s d n l r e H T K I H T G  
TGTGGGAGGAAGTTTGCCCGCTCCGACAACCTGCGCGAGCATAACCAAGATACACACGGGA

S Q K P F Q C R I C M R N F S r s d a l  
TCTCAGAAGCCCTTCCAGTGTCTGAATCTGCATGCGTAACTTCAGTCGTAGTGACGCCCTG

s e H I R T H T G E K P F A C D I C G R  
AGCGAACACATCCGCACCCACACAGGCGAGAAGCCTTTTGCCTGTGACATTTGTGGGAGG

K F A q n a t r t k H T K I H L R  
AAATTTGCCCAGAACGCCACCCGCACAAAGCATAACCAAGATACACCTGCGG

**Fok-L**

G S Q L V K S E L E E K K S E L R H K L  
GGATCCCAGCTGGTGAAGAGCGAGCTGGAGGAGAAGAAGTCCGAGCTGCGGCACAAGCTG  
*BamHI*

K Y V P H E Y I E L I E I A R N S T Q D  
AAGTACGTGCCCCACGAGTACATCGAGCTGATCGAGATCGCCAGGAACAGCACCCAGGAC

R I L E M K V M E F F M K V Y G Y R G K  
CGCATCCTGGAGATGAAGGTGATGGAGTTCTTCATGAAGGTGTACGGCTACAGGGGAAAG

H L G G S R K P D G A I Y T V G S P I D  
CACCTGGGCGGAAGCAGAAAGCCTGACGGCGCCATCTATACAGTGGGCAGCCCCATCGAT

Y G V I V D T K A Y S G G Y N L P I G Q  
TACGGCGTGATCGTGGACACAAAGGCCTACAGCGGCGGCTACAATCTGCCTATCGGCCAG

A D E M E R Y V E E N Q T R N K H L N P  
GCCGACGAGATGGAGAGATACGTGGAGGAGAACCAGACCCGGAATAAGCACCTCAACCCC

N E W W K V Y P S S V T E F K F L F V S  
AACGAGTGGTGAAGGTGTACCCTAGCAGCGTGACCGAGTTCAAGTTCCTGTTCGTGAGC

G H F K G N Y K A Q L T R L N H I T N C  
GGCCACTTCAAGGGCAACTACAAGGCCAGCTGACCAGGCTGAACCACATCACCAACTGC

N G A V L S V E E L L I G G E M I K A G  
AATGGCGCCGTGCTGAGCGTGGAGGAGCTGCTGATCGGCGGCGAGATGATCAAAGCCGGC

T L T L E E V R R K F N N G E I N F R S  
ACCCTGACACTGGAGGAGGTGCGGCGCAAGTTCAACAACGGCGAGATCAACTTCAGATCT  
*Bgl II*

G G G E G R G S L L T C G D V E E N P G  
GGCGGCGGAGAGGGCAGAGGAAGTCTTCTAACATGCGGTGACGTGGAGGAGAATCCC

P R M D Y K D H D G D Y K D H D I D Y K  
CCTAGGATGGACTACAAAGACCATGACGGTGATTATAAAGATCATGACATCGATTACAAG

D D D D K M A P K K K R K V G I H G V P  
GATGACGATGACAAGATGGCCCCAAGAAGAAGAGGAAGGTGGGCATTACAGGGGTACC  
*Kpn I*

**ZFP-R**

A A M A E R P F Q C R I C M R N F S d r  
GCCGCTATGGCTGAGAGGCCCTTCCAGTGTGGAATCTGCATGCGTAACTTCAGTGACCGC

s d l s r H I R T H T G E K P F A C D I  
TCCGACCTGTCCCGCCACATCCGCACCCACACAGGCGAGAAGCCTTTTGCCTGTGACATT

C G R K F A r s d d l t r H T K I H T G  
TGTGGGAGGAAGTTTGCCCGCTCCGACGACCTGACCCGCCATACCAAGATACACACGGGC

G G G S Q K P F Q C R I C M R N F S r s  
GGAGGCGGATCTCAGAAGCCCTTCCAGTGTGGAATCTGCATGCGTAACTTCAGTCGCTCC

d d l t r H I R T H T G E K P F A C D I  
GACGACCTGACCCGCCACATCCGCACCCACACAGGCGAGAAGCCTTTTGCCTGTGACATT

C G R K F A q s g d l t r H T K I H L R  
TGTGGGAGGAAGTTTGCCCGCTCCGCGACCTGACCCGCCATACCAAGATACACCTGCGG

**Fok-R**

G S Q L V K S E L E E K K S E L R H K L  
GGATCCCAGCTGGTGAAGAGCGAGCTGGAGGAGAAGAAGTCCGAGCTGCGGCACAAGCTG  
*BamHI*

K Y V P H E Y I E L I E I A R N S T Q D

AAGTACGTGCCCCACGAGTACATCGAGCTGATCGAGATCGCCAGGAACAGCACCCAGGAC  
R I L E M K V M E F F M K V Y G Y R G K  
CGCATCCTGGAGATGAAGGTGATGGAGTTCTTCATGAAGGTGTACGGCTACAGGGGAAAG  
H L G G S R K P D G A I Y T V G S P I D  
CACCTGGGCGGAAGCAGAAAGCCTGACGGCGCCATCTATACAGTGGGCAGCCCCATCGAT  
Y G V I V D T K A Y S G G Y N L P I G Q  
TACGGCGTGATCGTGGACACAAAGGCCTACAGCGGCGGCTACAATCTGCCTATCGGCCAG  
A D E M Q R Y V K E N Q T R N K H I N P  
GCCGACGAGATGCAGAGATACGTGAAGGAGAACCAGACCCGGAATAAGCACATCAACCCC  
N E W W K V Y P S S V T E F K F L F V S  
AACGAGTGGTGAAGGTGTACCCTAGCAGCGTGACCGAGTTCAAGTTCCTGTTCTGTGAGC  
G H F K G N Y K A Q L T R L N H K T N C  
GGCCACTTCAAGGGCAACTACAAGGCCAGCTGACCAGGCTGAACCACAAAACCAACTGC  
N G A V L S V E E L L I G G E M I K A G  
AATGGCGCCGTGCTGAGCGTGGAGGAGCTGCTGATCGGCGGCGAGATGATCAAAGCCGGC  
T L T L E E V R R K F N N G E I N F \*  
ACCCTGACACTGGAGGAGGTGCGGCGCAAGTTCAACAACGGCGAGATCAACTTCTGATAA

CTCGAGTCTAGAGGGCCCGTTTAAACCCGCTGATCAGCCTCGACTGTGCCTTCTAGTTGC  
*XhoI* *BGH poly(A) signal*

CAGCCATCTGTTGTTTGGCCCTCCCCCGTGCCTTCTTGACCCTGGAAGGTGCCACTCCC  
ACTGTCCTTTCCTAATAAAATGAGGAAATTGCATCGCATTGTCTGAGTAGGTGTCATTCT  
ATTCTGGGGGGTGGGGTGGGGCAGGACAGCAAGGGGGAGGATTGGGAAGACAATAGCAGG  
CATGCTGGGGATGCGGTGGGCTCTATGGCTTCTACTGGGCGGTTTTATGGACAGCAAGCG  
AACCGGAATTGCCAGCTGGGGCGCCCTCTGGTAAGGTTGGGAAGCCCTGCAAAGTAAACT  
GGATGGCTTTCTCGCCGCCAAGGATCTGATGGCGCAGGGGATCAAGCTCTGATCAAGAGA  
CAGGATGAGGATCGTTTCGCATGATTGAACAAGATGGATTGCACGCAGGTTCTCCGGCCG  
*EagI*

**golden pair 14**

CTGGCTAACTAGAGAACCCACTGCTTACTGGCTTATCGAAATTAATACGACTCACTATAG  
*T7 promoter*

GGAGACCCAAGCTGGCTAGCGTTTAAACTTAAGCTGATCCACTAGTCCAGTGTGGTGGAA

M D Y K D H D G D Y K D H D I D Y K  
TTCGCCATGGACTACAAAGACCATGACGGTGATTATAAAGATCATGACATCGATTACAAG

D D D D K M A P K K K R K V G I H G V P  
GATGACGATGACAAGATGGCCCCAAGAAGAAGAGGAAGGTGGGCATTCACGGGGTACCC  
*Kpn I*

**ZFP-L**

A A M A E R P F Q C R I C M R N F S q\_s  
GCCGCTATGGCTGAGAGGCCCTTCCAGTGTCTGAATCTGCATGCGTAACTTCAGTCAGTCC

g\_n\_l\_a\_r H I R T H T G E K P F A C D I  
GGCAACCTGGCCCGCCACATCCGCACCCACACAGGCGAGAAGCCTTTTGCCTGTGACATT

C G R K F A t\_s\_a\_n\_l\_s\_r H T K I H T G  
TGTGGGAGGAAGTTTGCCACCTCCGCCAACCTGTCCCGCCATACCAAGATACACACGGGA

S Q K P F Q C R I C M R N F S r\_s\_d\_t\_l  
TCTCAGAAGCCCTTCCAGTGTCTGAATCTGCATGCGTAACTTCAGTCGTAGTGACACCCTG

s\_e H I R T H T G E K P F A C D I C G R  
AGCGAACACATCCGCACCCACACGGGCGAGAAGCCTTTTGCCTGTGACATTTGTGGGAGG

K F A r\_s\_q\_t\_r\_k\_t H T K I H L R  
AAATTTGCCCGCAGCCAGACCCGCAAAACCCATACCAAGATACACCTGCGG

**Fok-L**

G S Q L V K S E L E E K K S E L R H K L  
GGATCCCAGCTGGTGAAGAGCGAGCTGGAGGAGAAGAAGTCCGAGCTGCGGCACAAGCTG  
*BamHI*

K Y V P H E Y I E L I E I A R N S T Q D  
AAGTACGTGCCCCACGAGTACATCGAGCTGATCGAGATCGCCAGGAACAGCACCCAGGAC

R I L E M K V M E F F M K V Y G Y R G K  
CGCATCCTGGAGATGAAGGTGATGGAGTTCTTCATGAAGGTGTACGGCTACAGGGGAAAG

H L G G S R K P D G A I Y T V G S P I D  
CACCTGGGCGGAAGCAGAAAGCCTGACGGCGCCATCTATACAGTGGGCAGCCCCATCGAT

Y G V I V D T K A Y S G G Y N L P I G Q  
TACGGCGTGATCGTGGACACAAAGGCCTACAGCGGCGGCTACAATCTGCCTATCGGCCAG

A D E M E R Y V E E N Q T R N K H L N P  
GCCGACGAGATGGAGAGATACGTGGAGGAGAACCAGACCCGGAATAAGCACCTCAACCC

N E W W K V Y P S S V T E F K F L F V S  
AACGAGTGGTGAAGGTGTACCCTAGCAGCGTGACCGAGTTCAGTTCCTGTTCGTGAGC

G H F K G N Y K A Q L T R L N H I T N C  
GGCCACTTCAAGGGCAACTACAAGGCCAGCTGACCAGGCTGAACCACATCACCAACTGC

N G A V L S V E E L L I G G E M I K A G  
AATGGCGCCGTGCTGAGCGTGGAGGAGCTGCTGATCGGGCGGAGATGATCAAAGCCGGC

T L T L E E V R R K F N N G E I N F R S  
ACCCTGACACTGGAGGAGGTGCGGGCGCAAGTTCAACAACGGCGAGATCAACTTCAGATCT  
*Bgl II*

G G G E G R G S L L T C G D V E E N P G  
GGCGGGGAGAGGGCAGAGGAAGTCTTCTAACATGCGGTGACGTGGAGGAGAATCCC

P R M D Y K D H D G D Y K D H D I D Y K  
CCTAGGATGGACTACAAAGACCATGACGGTGATTATAAAGATCATGACATCGATTACAAG

D D D D K M A P K K K R K V G I H G V P  
GATGACGATGACAAGATGGCCCCAAGAAGAAGAGGAAGGTGGGCATTTCACGGGGTACC  
*Kpn I*

**ZFP-R**

A A M A E R P F Q C R I C M R N F S d r  
GCCGCTATGGCTGAGAGGCCCTTCCAGTGTCGAATCTGCATGCGTAACTTCAGTGACCGC

S h l s r H I R T H T G E K P F A C D I  
TCCCACCTGTCCCGCCACATCCGCACCCACACAGGCGAGAAGCCTTTTGCCTGTGACATT

C G R K F A r s d a l a r H T K I H T G  
TGTGGGAGGAAGTTTGGCCGCTCCGACGCCCTGGCCCGCCATACCAAGATACACACGGGA

S Q K P F Q C R I C M R N F S d r s n l  
TCTCAGAAGCCCTTCCAGTGTCGAATCTGCATGCGTAACTTCAGTGACCGCTCCAACCTG

s r H I R T H T G E K P F A C D I C G R  
TCCCGCCACATCCGCACCCACACAGGCGAGAAGCCTTTTGCCTGTGACATTTGTGGGAGG

K F A t s g s l t r H T K I H L R  
AAGTTTGCCACCTCCGGCTCCCTGACCCGCCATACCAAGATACACCTGCGG

**Fok-R**

G S Q L V K S E L E E K K S E L R H K L  
GGATCCCAGCTGGTGAAGAGCGAGCTGGAGGAGAAGAAGTCCGAGCTGCGGCACAAGCTG  
*BamHI*

K Y V P H E Y I E L I E I A R N S T Q D  
AAGTACGTGCCCCACGAGTACATCGAGCTGATCGAGATCGCCAGGAACAGCACCCAGGAC

R I L E M K V M E F F M K V Y G Y R G K  
CGCATCCTGGAGATGAAGGTGATGGAGTTCTTCATGAAGGTGTACGGCTACAGGGGAAAG

H L G G S R K P D G A I Y T V G S P I D  
CACCTGGGCGGAAGCAGAAAGCCTGACGGCGCCATCTATACAGTGGGCAGCCCCATCGAT

Y G V I V D T K A Y S G G Y N L P I G Q



TACGGCGTGATCGTGGACACAAAGGCCTACAGCGGCGGCTACAATCTGCCTATCGGCCAG  
A D E M Q R Y V K E N Q T R N K H I N P  
GCCGACGAGATGCAGAGATACGTGAAGGAGAACCAGACCCGGAATAAGCACATCAACCCC  
N E W W K V Y P S S V T E F K F L F V S  
AACGAGTGGTGAAGGTGTACCCTAGCAGCGTGACCGAGTTCAAGTTCCTGTTCGTGAGC  
G H F K G N Y K A Q L T R L N H K T N C  
GGCCACTTCAAGGGCAACTACAAGGCCAGCTGACCAGGCTGAACCACAAAACCAACTGC  
N G A V L S V E E L L I G G E M I K A G  
AATGGCGCCGTGCTGAGCGTGGAGGAGCTGCTGATCGGCGGCGAGATGATCAAAGCCGGC  
T L T L E E V R R K F N N G E I N F \*  
ACCCTGACACTGGAGGAGGTGCGGCGCAAGTTCAACAACGGCGAGATCAACTTCTGATAA

CTCGAGTCTAGAGGGCCCGTTTAAACCCGCTGATCAGCCTCGACTGTGCCTTCTAGTTGC  
*Xho I* *BGH poly(A) signal*

CAGCCATCTGTTGTTTGCCCTCCCCCGTGCCTTCCTTGACCCTGGAAGGTGCCACTCCC  
ACTGTCCTTTCCTAATAAAAATGAGGAAATTGCATCGCATTGTCTGAGTAGGTGTCATTCT  
ATTCTGGGGGGTGGGGTGGGGCAGGACAGCAAGGGGGAGGATTGGGAAGACAATAGCAGG  
CATGCTGGGGATGCGGTGGGCTCTATGGCTTCTACTGGGCGGTTTTATGGACAGCAAGCG  
AACCGGAATTGCCAGCTGGGGCGCCCTCTGGTAAGGTTGGGAAGCCCTGCAAAGTAAACT  
GGATGGCTTTCTCGCCGCCAAGGATCTGATGGCGCAGGGGATCAAGCTCTGATCAAGAGA  
CAGGATGAGGATCGTTTCGCATGATTGAACAAGATGGATTGCACGCAGGTTCTCCGGCCG  
*EagI*

**golden pair 15**

CTGGCTAACTAGAGAACCCACTGCTTACTGGCTTATCGAAATTAATACGACTCACTATAG  
*T7 promoter*

GGAGACCCAAGCTGGCTAGCGTTTAAACTTAAGCTGATCCACTAGTCCAGTGTGGTGAA

M D Y K D H D G D Y K D H D I D Y K  
TTCGCCATGGACTACAAAGACCATGACGGTGATTATAAAGATCATGACATCGATTACAAG

D D D D K M A P K K K R K V G I H G V P  
GATGACGATGACAAGATGGCCCCAAGAAGAAGAGGAAGGTGGGCATTACAGGGGTACCC  
*Kpn I*

**ZFP-L**

A A M A E R P F Q C R I C M R N F S q s  
GCCGCTATGGCTGAGAGGCCCTTCCAGTGTGCAATCTGCATGCGTAACTTCAGTCAGTCC

g n l a r H I R T H T G E K P F A C D I  
GGCAACCTGGCCCCGACATCCGCACCCACACAGGCGAGAAGCCTTTTGCCTGTGACATT

C G R K F A t s g n l t r H T K I H T G  
TGTGGGAGGAAGTTTGCCACCTCCGGCAACCTGACCCGCCATACCAAGATACACACGGGA

S Q K P F Q C R I C M R N F S r s d t l  
TCTCAGAAGCCCTTCCAGTGTGCAATCTGCATGCGTAACTTCAGTCGTAGTGACACCCTG

s e H I R T H T G E K P F A C D I C G R  
AGCGAACACATCCGCACCCACACGGGCGAGAAGCCTTTTGCCTGTGACATTTGTGGGAGG

K F A r s q t r k t H T K I H L R  
AAATTTGCCCGCAGCCAGACCCGCAAAACCCATACCAAGATACACCTGCGG

**Fok-L**

G S Q L V K S E L E E K K S E L R H K L  
GGATCCCAGCTGGTGAAGAGCGAGCTGGAGGAGAAGAAGTCCGAGCTGCGGCACAAGCTG  
*BamHI*

K Y V P H E Y I E L I E I A R N S T Q D  
AAGTACGTGCCCCACGAGTACATCGAGCTGATCGAGATCGCCAGGAACAGCACCCAGGAC

R I L E M K V M E F F M K V Y G Y R G K  
CGCATCCTGGAGATGAAGGTGATGGAGTTCTTCATGAAGGTGTACGGCTACAGGGGAAAG

H L G G S R K P D G A I Y T V G S P I D  
CACCTGGGCGGAAGCAGAAAGCCTGACGGCGCCATCTATACAGTGGGCAGCCCCATCGAT

Y G V I V D T K A Y S G G Y N L P I G Q  
TACGGCGTGATCGTGGACACAAAGGCCTACAGCGGCGGCTACAATCTGCCTATCGGCCAG

A D E M E R Y V E E N Q T R N K H L N P  
GCCGACGAGATGGAGAGATACGTGGAGGAGAACCAGACCCGGAATAAGCACCTCAACCCC

N E W W K V Y P S S V T E F K F L F V S  
AACGAGTGGTGAAGGTGTACCCTAGCAGCGTGACCGAGTTCAAGTTCCTGTTCGTGAGC

G H F K G N Y K A Q L T R L N H I T N C  
GGCCACTTCAAGGGCAACTACAAGGCCAGCTGACCAGGCTGAACCACATCACCAACTGC

N G A V L S V E E L L I G G E M I K A G  
AATGGCGCCGTGCTGAGCGTGGAGGAGCTGCTGATCGGCGGCGAGATGATCAAAGCCGGC

T L T L E E V R R K F N N G E I N F R S  
ACCCTGACACTGGAGGAGGTGCGGCGCAAGTTCAACAACGGCGAGATCAACTTCAGATCT  
*Bgl II*

G G G E G R G S L L T C G D V E E N P G  
GGCGGCGGAGAGGGCAGAGGAAGTCTTCTAACATGCGGTGACGTGGAGGAGAATCCC

P R M D Y K D H D G D Y K D H D I D Y K  
CCTAGGATGGACTACAAAGACCATGACGGTGATTATAAAGATCATGACATCGATTACAAG

D D D D K M A P K K K R K V G I H G V P  
GATGACGATGACAAGATGGCCCCAAGAAGAAGAGGAAGGTGGGCATTTCACGGGGTACC  
*Kpn I*

**ZFP-R**

A A M A E R P F Q C R I C M R N F S d r  
GCCGCTATGGCTGAGAGGCCCTTCCAGTGTCGAATCTGCATGCGTAACTTCAGTGACCGC

s h l s r H I R T H T G E K P F A C D I  
TCCCACCTGTCCCGCCACATCCGCACCCACACAGGCGAGAAGCCTTTTGCCTGTGACATT

C G R K F A r s d a l a r H T K I H T G  
TGTGGGAGGAAGTTTGGCCGCTCCGACGCCCTGGCCCGCCATACCAAGATACACACGGGA

S Q K P F Q C R I C M R N F S d r s n l  
TCTCAGAAGCCCTTCCAGTGTCGAATCTGCATGCGTAACTTCAGTGACCGCTCCAACCTG

s r H I R T H T G E K P F A C D I C G R  
TCCCGCCACATCCGCACCCACACAGGCGAGAAGCCTTTTGCCTGTGACATTTGTGGGAGG

K F A t s g s l t r H T K I H L R  
AAGTTTGCCACCTCCGGCTCCCTGACCCGCCATACCAAGATACACCTGCGG

**Fok-R**

G S Q L V K S E L E E K K S E L R H K L  
GGATCCCAGCTGGTGAAGAGCGAGCTGGAGGAGAAGAAGTCCGAGCTGCGGCACAAGCTG  
*BamHI*

K Y V P H E Y I E L I E I A R N S T Q D  
AAGTACGTGCCCCACGAGTACATCGAGCTGATCGAGATCGCCAGGAACAGCACCCAGGAC

R I L E M K V M E F F M K V Y G Y R G K  
CGCATCCTGGAGATGAAGGTGATGGAGTTCTTCATGAAGGTGTACGGCTACAGGGGAAAG

H L G G S R K P D G A I Y T V G S P I D  
CACCTGGGCGGAAGCAGAAAGCCTGACGGCGCCATCTATACAGTGGGCAGCCCCATCGAT

Y G V I V D T K A Y S G G Y N L P I G Q

TACGGCGTGATCGTGGACACAAAGGCCTACAGCGGCGGCTACAATCTGCCTATCGGCCAG  
A D E M Q R Y V K E N Q T R N K H I N P  
GCCGACGAGATGCAGAGATACGTGAAGGAGAACCAGACCCGGAATAAGCACATCAACCCC  
N E W W K V Y P S S V T E F K F L F V S  
AACGAGTGGTGAAGGTGTACCCTAGCAGCGTGACCGAGTTCAAGTTCCTGTTCGTGAGC  
G H F K G N Y K A Q L T R L N H K T N C  
GGCCACTTCAAGGGCAACTACAAGGCCAGCTGACCAGGCTGAACCACAAAACCAACTGC  
N G A V L S V E E L L I G G E M I K A G  
AATGGCGCCGTGCTGAGCGTGGAGGAGCTGCTGATCGGCGGCGAGATGATCAAAGCCGGC  
T L T L E E V R R K F N N G E I N F \*  
ACCCTGACACTGGAGGAGGTGCGGCGCAAGTTCAACAACGGCGAGATCAACTTCTGATAA

CTCGAGTCTAGAGGGCCCGTTTAAACCCGCTGATCAGCCTCGACTGTGCCTTCTAGTTGC  
*Xho I* *BGH poly(A) signal*

CAGCCATCTGTTGTTTGCCCTCCCCCGTGCCTTCCTTGACCCTGGAAGGTGCCACTCCC  
ACTGTCCTTTCCTAATAAAAATGAGGAAATTGCATCGCATTGTCTGAGTAGGTGTCATTCT  
ATTCTGGGGGGTGGGGTGGGGCAGGACAGCAAGGGGGAGGATTGGGAAGACAATAGCAGG  
CATGCTGGGGATGCGGTGGGCTCTATGGCTTCTACTGGGCGGTTTTATGGACAGCAAGCG  
AACCGGAATTGCCAGCTGGGGCGCCCTCTGGTAAGGTTGGGAAGCCCTGCAAAGTAAACT  
GGATGGCTTTCTCGCCGCCAAGGATCTGATGGCGCAGGGGATCAAGCTCTGATCAAGAGA  
CAGGATGAGGATCGTTTCGCATGATTGAACAAGATGGATTGCACGCAGGTTCTCCGGCCG  
*Eag I*

**Supplementary Figure 5: ELISA data for DNA binding by all the ZFPs designed and assembled against the *ntl* locus.** Each ZFN was evaluated for DNA binding using an ELISA assay performed as described (Bartsevich et al, 2003). The first sample is a negative control; the second and third sample, respectively, are positive controls and represent ZFN-R and ZFN-L from previous work (Urnov et al., 2005). Each ZFN is annotated by a specific base-pair position within the *ntl* locus (the cDNA cannot be used as a reference in this context because some ZFNs span exon/intron boundaries). In this nomenclature, position #1 corresponds to the transcription start site of the *ntl* gene as per the UCSC genome browser DanRer5 zebrafish genome annotation (July 2005); an “r” before the ZFN name indicates that its primary recognition is the Crick strand. The ZFNs highlighted in red form pairs 2 and 3, respectively, used in the primary text. Pair 2 ZFN-R is 1607a1, Pair 3 ZFN-L is 1607b1, and Pair 2/3 ZFN-L is r1600a1.

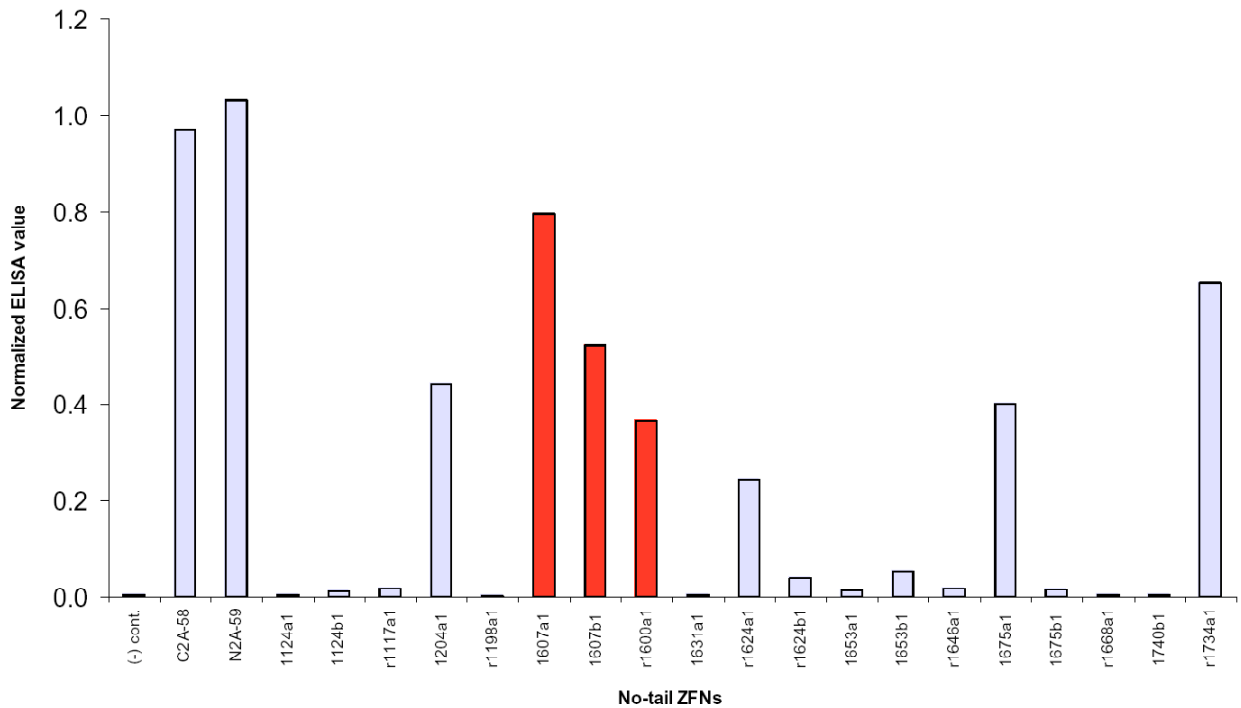

**Supplementary Figure 6: The full DNA/amino acid sequence of the ZFNs used for *ntl* gene disruption (the vector backbone and overall arrangement is identical to that shown in Supplementary Fig. 4).**

ZFN expression vector sequence

- 1) The ZFP DNA binding helices are shown in lower case and underlined.
- 2) The 2A peptide sequence is double-underlined.
- 3) The Eag I restriction site and the T7 promoter used to linearize the plasmid and drive mRNA transcription, respectively, are indicated.

***ntl* pair 2**

CTGGCTAACTAGAGAACCCACTGCTTACTGGCTTATCGAAATTAATACGACTCACTATAG  
*T7 promoter*

GGAGACCCAAGCTGGCTAGCGTTTAAACTTAAGCTGATCCACTAGTCCAGTGTGGTGGAA

M D Y K D H D G D Y K D H D I D Y K  
TTCGCCATGGACTACAAAGACCATGACGGTGATTATAAAGATCATGACATCGATTACAAG

D D D D K M A P K K K R K V G I H G V P  
GATGACGATGACAAGATGGCCCCAAGAAGAAGAGGAAGGTGGGCATTACGGGGTACCC  
*Kpn I*

**ZFP-L**

A A M A E R P F Q C R I C M R N F S r s  
GCCGCTATGGCTGAGAGGCCCTTCCAGTGTGCAATCTGCATGCGTAACTTCAGTCGTAGT

d n l s r H I R T H T G E K P F A C D I  
GACAACCTGAGCCGGCACATCCGCACCCACACAGGCGAGAAGCCTTTTGCCTGTGACATT

C G R K F A d s s t r k k H T K I H T G  
TGTGGGAGGAAATTTGCCGACAGCAGCACCCGCAAAAAGCATAACCAAGATACACACGGGA

S Q K P F Q C R I C M R N F S r s d h l  
TCTCAGAAGCCCTTCCAGTGTGCAATCTGCATGCGTAACTTCAGTCGCTCCGACCACCTG

s a H I R T H T G E K P F A C D I C G R  
TCCGCCACATCCGCACCCACACAGGCGAGAAGCCTTTTGCCTGTGACATTTGTGGGAGG

K F A h s n a r k t H T K I H L R  
AAGTTTGCCCACTCCAACGCCCGCAAGACCCATAACCAAGATACACCTGCGG

**Fok-L**

G S Q L V K S E L E E K K S E L R H K L  
GGATCCCAGCTGGTGAAGAGCGAGCTGGAGGAGAAGAAGTCCGAGCTGCGGCACAAGCTG  
*BamHI*

K Y V P H E Y I E L I E I A R N S T Q D  
AAGTACGTGCCCCACGAGTACATCGAGCTGATCGAGATCGCCAGGAACAGCACCCAGGAC

R I L E M K V M E F F M K V Y G Y R G K  
CGCATCCTGGAGATGAAGGTGATGGAGTTCTTCATGAAGGTGTACGGCTACAGGGGAAAG

H L G G S R K P D G A I Y T V G S P I D  
CACCTGGGCGGAAGCAGAAAGCCTGACGGCGCCATCTATACAGTGGGCAGCCCCATCGAT  
Y G V I V D T K A Y S G G Y N L P I G Q  
TACGGCGTGATCGTGGACACAAAGGCCTACAGCGGGCTACAATCTGCCTATCGGCCAG  
A D E M Q R Y V E E N Q T R N K H I N P  
GCCGACGAGATGCAGAGATACGTGGAGGAGAACCAGACCCGGAATAAGCACATCAACCCC  
N E W W K V Y P S S V T E F K F L F V S  
AACGAGTGGTGAAGGTGTACCCTAGCAGCGTGACCGAGTTCAAGTTCCTGTTCGTGAGC  
G H F K G N Y K A Q L T R L N H I T N C  
GGCCACTTCAAGGGCAACTACAAGGCCAGCTGACCAGGCTGAACCACATCACCAACTGC  
N G A V L S V E E L L I G G E M I K A G  
AATGGCGCCGTGCTGAGCGTGGAGGAGCTGCTGATCGGCGGCGAGATGATCAAAGCCGGC  
T L T L E E V R R K F N N G E I N F R S  
ACCCTGACACTGGAGGAGGTGCGGGCGCAAGTTCAACAACGGCGAGATCAACTTCAGATCT

*Bgl II*

G G G E G R G S L L T C G D V E E N P G  
GGCGGCGGAGAGGGCAGAGGAAGTCTTCTAACATGCGGTGACGTGGAGGAGAATCCCGGC  
P R M D Y K D H D G D Y K D H D I D Y K  
CCTAGGATGGACTACAAAGACCATGACGGTGATTATAAAGATCATGACATCGATTACAAG  
D D D D K M A P K K K R K V G I H G V P  
GATGACGATGACAAGATGGCCCCAAGAAGAAGAGGAAGGTGGGCATTTCACGGGGTACC

*Kpn I*

**ZFP-R**

A A M A E R P F Q C R I C M R N F S r s  
GCCGCTATGGCTGAGAGGCCCTTCCAGTGTCGAATCTGCATGCGTAACTTCAGTCGTAGT  
d t l s q H I R T H T G E K P F A C D I  
GACACCCTGAGCCAGCACATCCGCACCCACACAGGCGAGAAGCCTTTTGCCTGTGACATT  
C G R K F A d r s a r t r H T K I H T G  
TGTGGAAGGAAATTTGCCGACAGGAGCGCCCGCACACGGCATAACCAAGATACACACGGGA  
S Q K P F Q C R I C M R N F S r s d d l  
TCTCAGAAGCCCTTCCAGTGTCGAATCTGCATGCGTAACTTCAGTCGTAGTGACGACCTG  
s k H I R T H T G E K P F A C D I C G R  
AGCAAGCACATCCGCACCCACACAGGCGAGAAGCCTTTTGCCTGTGACATTTGTGGGAGG  
K F A d n s n r i k H T K I H L R  
AAATTTGCCGACAACAGCAACCGCATAAAGCATAACCAAGATACACCTGCGG

**Fok-R**

G S Q L V K S E L E E K K S E L R H K L  
GGATCCCAGCTGGTGAAGAGCGAGCTGGAGGAGAAGAAGTCCGAGCTGCGGCACAAGCTG

*BamH I*

K Y V P H E Y I E L I E I A R N S T Q D  
AAGTACGTGCCCCACGAGTACATCGAGCTGATCGAGATCGCCAGGAACAGCACCCAGGAC  
R I L E M K V M E F F M K V Y G Y R G K  
CGCATCCTGGAGATGAAGGTGATGGAGTTCCTTCATGAAGGTGTACGGCTACAGGGGAAAG  
H L G G S R K P D G A I Y T V G S P I D  
CACCTGGGCGGAAGCAGAAAGCCTGACGGCGCCATCTATACAGTGGGCAGCCCCATCGAT  
Y G V I V D T K A Y S G G Y N L P I G Q  
TACGGCGTGATCGTGGACACAAAGGCCTACAGCGGGCTACAATCTGCCTATCGGCCAG  
A D E M Q R Y V E E N Q T R N K H I N P  
GCCGACGAGATGCAGAGATACGTGGAGGAGAACCAGACCCGGAATAAGCACATCAACCC  
N E W W K V Y P S S V T E F K F L F V S  
AACGAGTGGTGAAGGTGTACCCTAGCAGCGTGACCGAGTTCAGTTCCTGTTCGTGAGC  
G H F K G N Y K A Q L T R L N H I T N C  
GGCCACTTCAAGGGCAACTACAAGGCCAGCTGACCAGGCTGAACCACATCACCAACTGC  
N G A V L S V E E L L I G G E M I K A G  
AATGGCGCCGTGCTGAGCGTGGAGGAGCTGCTGATCGGCGGCGAGATGATCAAAGCCGGC  
T L T L E E V R R K F N N G E I N F \*  
ACCCTGACACTGGAGGAGGTGCGGGCGAAGTTCAACAACGGCGAGATCAACTTCTGATAA

CTCGAGTCTAGAGGGCCCGTTTAAACCCGCTGATCAGCCTCGACTGTGCCTTCTAGTTGC  
*Xho I* *BGH poly(A) signal*

CAGCCATCTGTTGTTTGCCCCCTCCCCGTGCCTTCCTTGACCCTGGAAGGTGCCACTCCC  
ACTGTCCTTTCCTAATAAAATGAGGAAATTGCATCGCATTGTCTGAGTAGGTGTCATTCT  
ATTCTGGGGGGTGGGGTGGGGCAGGACAGCAAGGGGGAGGATTGGGAAGACAATAGCAGG  
CATGCTGGGGATGCGGTGGGCTCTATGGCTTCTACTGGGCGTTTTATGGACAGCAAGCG  
AACCGGAATTGCCAGCTGGGGCGCCCTCTGGTAAGGTTGGGAAGCCCTGCAAAGTAACT  
GGATGGCTTCTCGCCGCAAGGATCTGATGGCGCAGGGGATCAAGCTCTGATCAAGAGA  
CAGGATGAGGATCGTTTCGCATGATTGAACAAGATGGATTGCACGCAGGTTCTCCGGCCG  
*EagI*



**ntl pair 3**

CTGGCTAACTAGAGAACCCACTGCTTACTGGCTTATCGAAATTAATACGACTCACTATAG  
*T7 promoter*

GGAGACCCAAGCTGGCTAGCGTTTAAACTTAAGCTGATCCACTAGTCCAGTGTGGTGGAA

M D Y K D H D G D Y K D H D I D Y K  
TTCGCCATGGACTACAAAGACCATGACGGTGATTATAAAGATCATGACATCGATTACAAG

D D D D K M A P K K K R K V G I H G V P  
GATGACGATGACAAGATGGCCCCAAGAAGAAGAGGAAGGTGGGCATTCACGGGGTACCC  
*Kpn I*

**ZFP-L**

A A M A E R P F Q C R I C M R N F S r s  
GCCGCTATGGCTGAGAGGCCCTTCCAGTGTCTGAATCTGCATGCGTAACTTCAGTCTGTAGT

d n l s r H I R T H T G E K P F A C D I  
GACAACCTGAGCCGGCACATCCGCACCCACACAGGCGAGAAGCCTTTTGCCTGTGACATT

C G R K F A d s s t r k k H T K I H T G  
TGTGGGAGGAAATTTGCCGACAGCAGCACCCGCAAAAAGCATAACCAAGATACACACGGGA

S Q K P F Q C R I C M R N F S r s d h l  
TCTCAGAAGCCCTTCCAGTGTCTGAATCTGCATGCGTAACTTCAGTCTGCTCCGACCACCTG

s a H I R T H T G E K P F A C D I C G R  
TCCGCCACATCCGCACCCACACAGGCGAGAAGCCTTTTGCCTGTGACATTTGTGGGAGG

K F A h s n a r k t H T K I H L R  
AAGTTTGCCCACTCCAACGCCCGCAAGACCCATAACCAAGATACACCTGCGG

**Fok-L**

G S Q L V K S E L E E K K S E L R H K L  
GGATCCCAGCTGGTGAAGAGCGAGCTGGAGGAGAAGAAGTCCGAGCTGCGGCACAAGCTG  
*BamHI*

K Y V P H E Y I E L I E I A R N S T Q D  
AAGTACGTGCCCCACGAGTACATCGAGCTGATCGAGATCGCCAGGAACAGCACCCAGGAC

R I L E M K V M E F F M K V Y G Y R G K  
CGCATCCTGGAGATGAAGGTGATGGAGTTCTTCATGAAGGTGTACGGCTACAGGGGAAAG

H L G G S R K P D G A I Y T V G S P I D  
CACCTGGGCGGAAGCAGAAAGCCTGACGGCGCCATCTATACAGTGGGCAGCCCCATCGAT

Y G V I V D T K A Y S G G Y N L P I G Q  
TACGGCGTGATCGTGGACACAAAGGCCTACAGCGGCGGCTACAATCTGCCTATCGGCCAG

A D E M Q R Y V E E N Q T R N K H I N P  
GCCGACGAGATGCAGAGATACGTGGAGGAGAACCAGACCCGGAATAAGCACATCAACCC

N E W W K V Y P S S V T E F K F L F V S  
AACGAGTGGTGAAGGTGTACCCTAGCAGCGTGACCGAGTTCAGTTCCTGTTCGTGAGC

G H F K G N Y K A Q L T R L N H I T N C  
GGCCACTTCAAGGGCAACTACAAGGCCAGCTGACCAGGCTGAACCACATCACCAACTGC

N G A V L S V E E L L I G G E M I K A G  
AATGGCGCCGTGCTGAGCGTGGAGGAGCTGCTGATCGGGCGGAGATGATCAAAGCCGGC

T L T L E E V R R K F N N G E I N F R S  
ACCCTGACACTGGAGGAGGTGCGGGCGCAAGTTCAACAACGGCGAGATCAACTTCAGATCT  
*Bgl II*

G G G E G R G S L L T C G D V E E N P G  
GGCGGCGGAGAGGGCAGAGGAAGTCTTCTAACATGCGGTGACGTGGAGGAGAATCCC

P R M D Y K D H D G D Y K D H D I D Y K  
CCTAGGATGGACTACAAAGACCATGACGGTGATTATAAAGATCATGACATCGATTACAAG

D D D D K M A P K K K R K V G I H G V P  
GATGACGATGACAAGATGGCCCCAAGAAGAAGAGGAAGGTGGGCATTTCACGGGGTACC  
*Kpn I*

**ZFP-R**

A A M A E R P F Q C R I C M R N F S r s  
GCCGCTATGGCTGAGAGGCCCTTCCAGTGTCGAATCTGCATGCGTAACTTCAGTCGTAGT

d t l s q H I R T H T G E K P F A C D I  
GACACCCTGAGCCAGCACATCCGCACCCACACAGGCGAGAAGCCTTTTGCCTGTGACATT

C G R K F A d r s a r t r H T K I H T G  
TGTGGAAGGAAATTTGCCGACAGGAGCGCCCGCACACGGCATAACCAAGATACACACGGGA

S Q K P F Q C R I C M R N F S r s d s l  
TCTCAGAAGCCCTTCCAGTGTCGAATCTGCATGCGTAACTTCAGTCGCTCCGACTCCCTG

s k H I R T H T G E K P F A C D I C G R  
TCCAAGCACATCCGCACCCACACAGGCGAGAAGCCTTTTGCCTGTGACATTTGTGGGAGG

K F A d n s n r i k H T K I H L R  
AAGTTTGCCGACAACCTCCAACCGCATCAAGCATAACCAAGATACACCTGCGG

**Fok-R**

G S Q L V K S E L E E K K S E L R H K L  
GGATCCCAGCTGGTGAAGAGCGAGCTGGAGGAGAAGAAGTCCGAGCTGCGGCACAAGCTG  
*BamHI*

K Y V P H E Y I E L I E I A R N S T Q D  
AAGTACGTGCCCCACGAGTACATCGAGCTGATCGAGATCGCCAGGAACAGCACCCAGGAC

R I L E M K V M E F F M K V Y G Y R G K  
CGCATCCTGGAGATGAAGGTGATGGAGTTCTTCATGAAGGTGTACGGCTACAGGGGAAAG

H L G G S R K P D G A I Y T V G S P I D  
CACCTGGGCGGAAGCAGAAAGCCTGACGGCGCCATCTATACAGTGGGCAGCCCCATCGAT

Y G V I V D T K A Y S G G Y N L P I G Q  
TACGGCGTGATCGTGGACACAAAGGCCTACAGCGGCGGCTACAATCTGCCTATCGGCCAG  
A D E M Q R Y V E E N Q T R N K H I N P  
GCCGACGAGATGCAGAGATACGTGGAGGAGAACCAGACCCGGAATAAGCACATCAACCCC  
N E W W K V Y P S S V T E F K F L F V S  
AACGAGTGGTGAAGGTGTACCCTAGCAGCGTGACCGAGTTCAAGTTCCTGTTCGTGAGC  
G H F K G N Y K A Q L T R L N H I T N C  
GGCCACTTCAAGGGCAACTACAAGGCCAGCTGACCAGGCTGAACCACATCACCAACTGC  
N G A V L S V E E L L I G G E M I K A G  
AATGGCGCCGTGCTGAGCGTGGAGGAGCTGCTGATCGGCGGCGAGATGATCAAAGCCGGC  
T L T L E E V R R K F N N G E I N F \*  
ACCCTGACACTGGAGGAGGTGCGGCGCAAGTTCAACAACGGCGAGATCAACTTCTGATAA

CTCGAGTCTAGAGGGCCCGTTTAAACCCGCTGATCAGCCTCGACTGTGCCTTCTAGTTGC  
*Xho I* *BGH poly(A) signal*

CAGCCATCTGTTGTTTGCCCTCCCCCGTGCCTTCCTTGACCCTGGAAGGTGCCACTCCC  
ACTGTCCTTTCCTAATAAAAATGAGGAAATTGCATCGCATTGTCTGAGTAGGTGTCATTCT  
ATTCTGGGGGGTGGGGTGGGGCAGGACAGCAAGGGGGAGGATTGGGAAGACAATAGCAGG  
CATGCTGGGGATGCGGTGGGCTCTATGGCTTCTACTGGGCGGTTTTATGGACAGCAAGCG  
AACCGGAATTGCCAGCTGGGGCGCCCTCTGGTAAGGTTGGGAAGCCCTGCAAAGTAAACT  
GGATGGCTTTCTCGCCGCCAAGGATCTGATGGCGCAGGGGATCAAGCTCTGATCAAGAGA  
CAGGATGAGGATCGTTTCGCATGATTGAACAAGATGGATTGCACGCAGGTTCTCCGGCCG  
*EagI*

**Supplementary Figure 7: ZFN injection can cause hypomorphic phenotypes.**

(A) mRNA encoding high-fidelity, obligate-heterodimer (Miller et al., 2007) ZFNs was injected into 1-cell embryos from a cross between wildtype and *ntl*<sup>b195</sup> heterozygous fish. ZFN-injected embryos have diminished or no notochord, misshapen somites, and reduced tail mesoderm, with phenotypes resembling both the null *ntl*<sup>b195</sup> homozygous mutant (see Fig. 3C) and the hypomorphic *ntl*<sup>b487</sup> homozygous mutant (top right panel). (B) When processed by in situ hybridization to detect notochordal *ntl* expression, *ntl* ZFN-injected embryos display a range of phenotypes, from normal expression (i) to disrupted and patchy expression (ii, iii), to completely absent expression (not shown). The patchy notochord phenotype is typical of that in hypomorphic *ntl*<sup>b487</sup> homozygous mutant embryos (v, vi); normal wildtype siblings are shown in panel (iv).

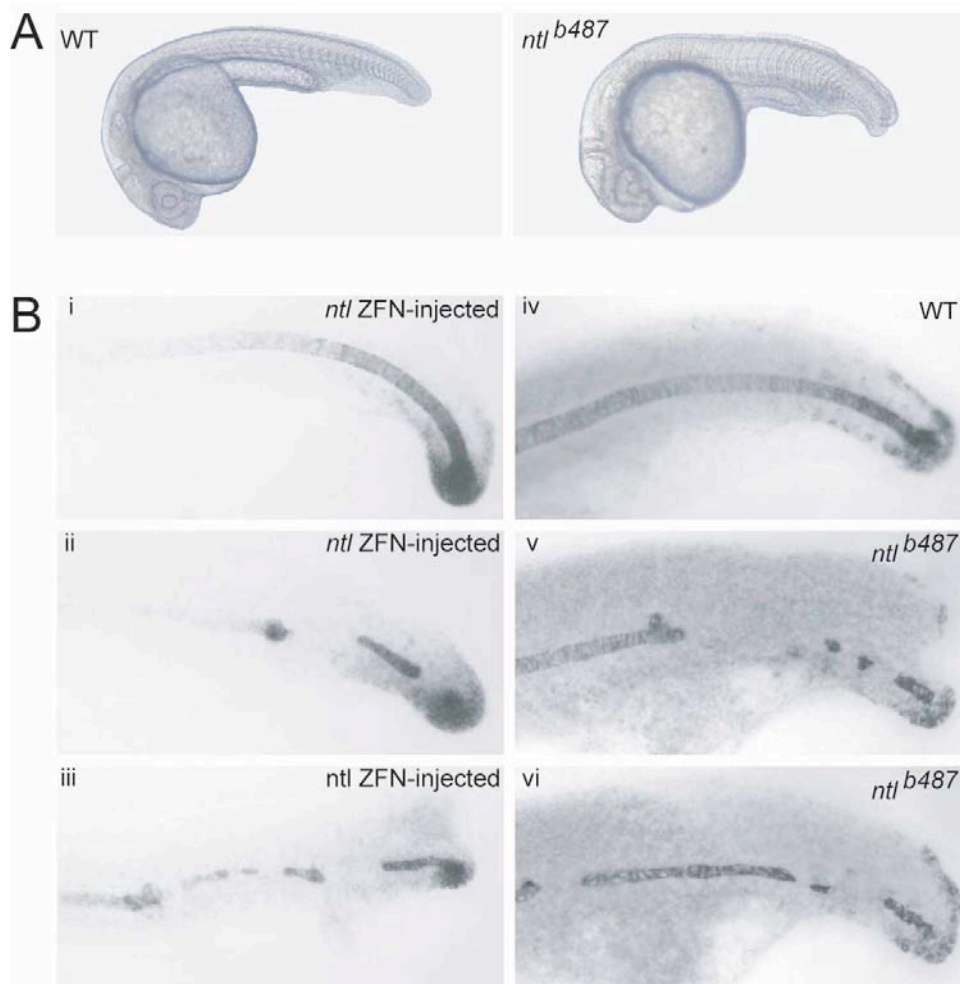

**Supplementary Figure 8: Injection of *ntl* ZFN-encoding mRNA into zebrafish embryos induces disruption of the *ntl* gene in somatic cells.** Nine individual *ntl*-like embryos (#1-#9) were assayed to assess the percentage of *ntl* loci that had undergone NHEJ using an assay based on the mismatch-sensitive endonuclease (“Surveyor”; Miller et al., 2007), and most showed clear evidence of ZFN-induced NHEJ, ranging from 3-17% of chromatids.

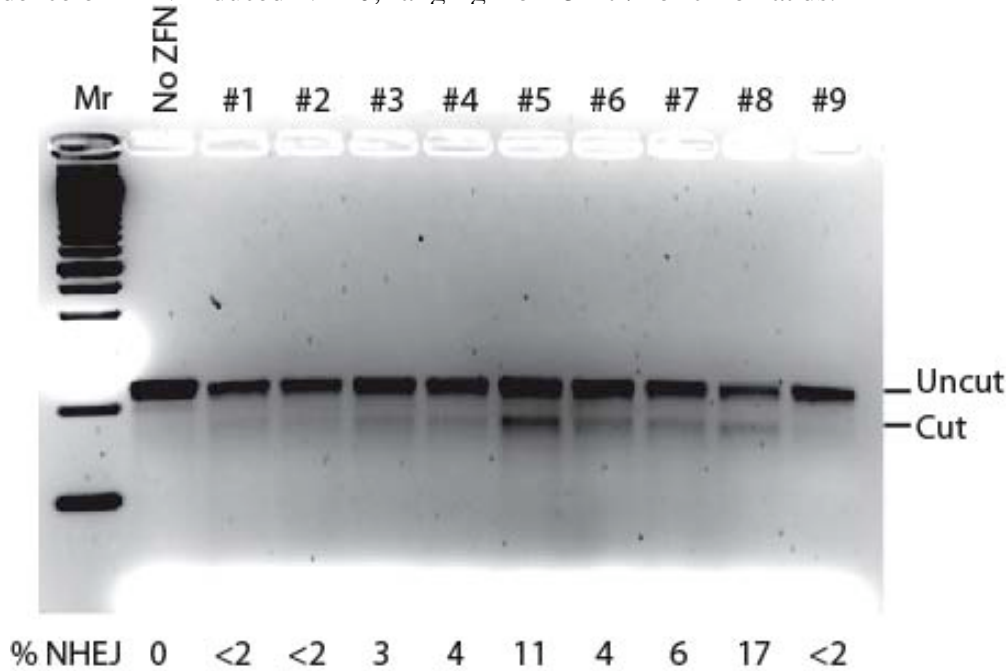

**Supplementary Figure 9: Injection of *ntl* ZFN-encoding mRNA into wildtype embryos induces tail phenotypes in juvenile and adult fish.** DNA was prepared from small posterior tissue samples obtained from tailless fish like those shown in Fig. 4A. The *ntl* locus surrounding the ZFN-cleavage site was amplified and sequenced from each of three tailless embryos. In every case, *ntl* mutant-bearing amplicons represent a substantial fraction of the total (Sample 1, 5/25 (20%) *ntl*-bearing chromatids, 2 different alleles; Sample 2, 3/30 (10%) *ntl*-bearing chromatids, 1 allele; Sample 3, 8/29 (28%) *ntl*-bearing chromatids, 4 different alleles). The frequency of each allele is indicated after the allele description.

### Tail sample #1

|                                         |                 |
|-----------------------------------------|-----------------|
| ZFN-L                                   | ZFN-R           |
| Leu Asp Pro Asn Ala Met Tyr Ser Val Leu | Leu Ser Val Leu |
| CTCGACCCTAATGCAATGTA                    |                 |
| CTCGACCCTAATGCAATGTA                    |                 |

TCAGAGCCAGTGTACCCGGTCTCGACCCTAATG :::: TACTCGGTCCTGCTGGATTTTGTGGCGGC (Δ5) 2x  
 TCAGAGCCAGTGTACCCGGTCTCGACCCTAATGCAATcaatGTA

### Tail sample #2

|                                         |                 |
|-----------------------------------------|-----------------|
| ZFN-L                                   | ZFN-R           |
| Leu Asp Pro Asn Ala Met Tyr Ser Val Leu | Leu Ser Val Leu |
| CTCGACCCTAATGCAATGTA                    |                 |
| CTCGACCCTAATGCAATGTA                    |                 |

TCAGAGCCAGTGTACCCGGTCTCGACCCTAATGCAATcaatGTA

### Tail sample #3

|                                         |                 |
|-----------------------------------------|-----------------|
| ZFN-L                                   | ZFN-R           |
| Leu Asp Pro Asn Ala Met Tyr Ser Val Leu | Leu Ser Val Leu |
| CTCGACCCTAATGCAATGTA                    |                 |
| CTCGACCCTAATGCAATGTA                    |                 |

TCAGAGCCAGTGTACCCGGTCTCGACCCTAATG :::: TACTCGGTCCTGCTGGATTTTGTGGCGGC (Δ5) 2x  
 TCAGAGCCAGTGTACCCGGTCTCGACCCTAATGC :::: :TCGGTCCTGCTGGATTTTGTGGCGGC (Δ7) 1x  
 TCAGAGCCAGTGTACCCGGTCTCGACCCTAATGCAATcaatGTA

**Supplementary Figure 10: Injection of *ntl* ZFN-encoding mRNA into wild-type embryos induces biallelic disruption of the *ntl* gene in somatic cells.** (A) Wild-type embryos injected with mRNA encoding *ntl*-targeting ZFN Pair 2 (carrying wild-type, rather than obligate-heterodimer FokI domains) show *ntl*-like phenotypes (middle panel), and some show additional mild necrosis (right panel); uninjected embryos are shown in the left panel. In situ hybridization of representative embryos to detect notochordal *ntl* expression are inset. (B) Allelic diversity for one representative *ntl*-targeting ZFN mRNA-injected embryo from (A). In all 3 embryos, a large number of unique *ntl* alleles were observed (>20) and 64-81% of the sequenced chromatids carried an induced mutation (Embryo 1, 38/59 *ntl*-bearing chromatids, Embryo 2, 44/63 *ntl*-bearing chromatids and Embryo 3, 62/77 *ntl*-bearing chromatids).

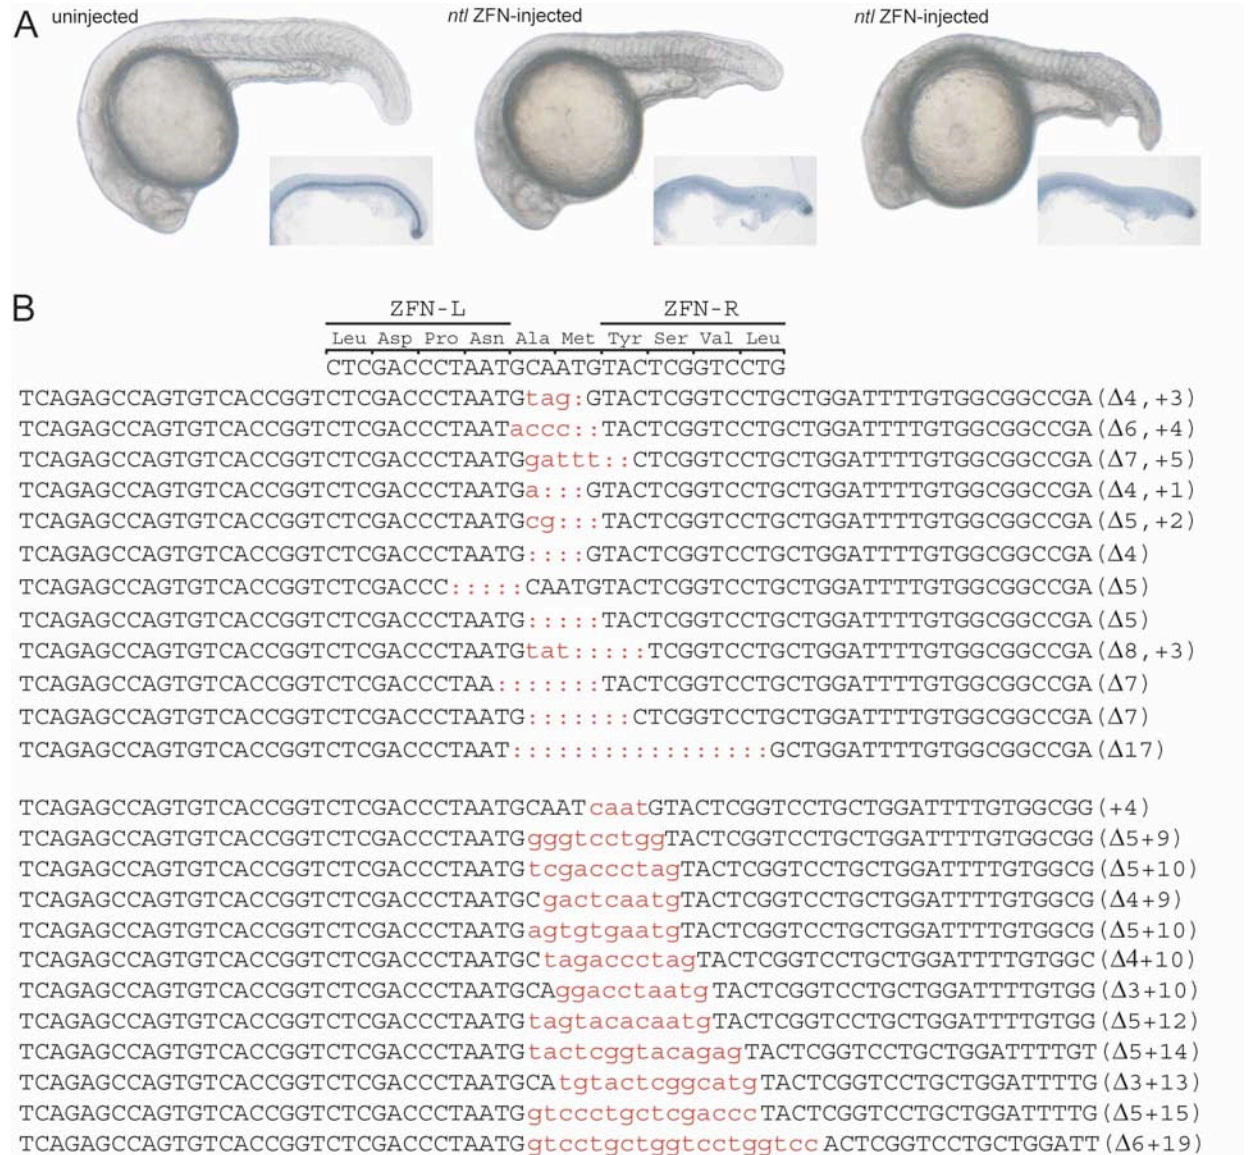



**Supplementary Figure 11: Analysis of ZFN action at potential off-target sites.**

(A) Experimental scheme to evaluate ZFN action at potential off-target sites. (B) The ZFN recognition site in the *ntl* gene, and a qualitative representation of *in vitro* site selection results showing the ZFN recognition sites determined experimentally. (C) A listing of the potential off-target sites for the ZFNs; the mismatches relative to the ZFN consensus sites are shown in lowercase.

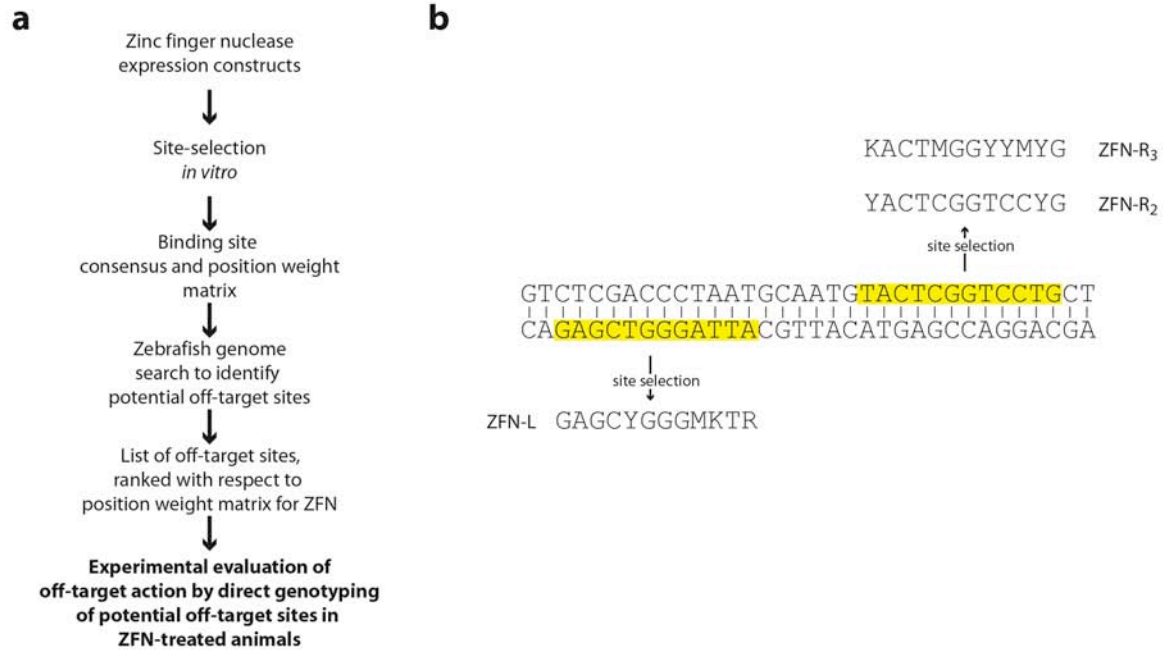

**c**

| # | Pair | Loc    | Pos         | Sequence                           | Gene                     | Coding?       | # of <i>ntl</i> progeny analyzed | Wild-type chromatids | Mutant chromatids |
|---|------|--------|-------------|------------------------------------|--------------------------|---------------|----------------------------------|----------------------|-------------------|
|   |      | chr19  | 20,038,174  | TCTCGACCCTAATGCAATGTACTCGGTCCCTGCT | <i>ntl</i>               | Exon 2        | 15                               | 0/15                 | 15/0              |
| 1 | 2/3  | chr8   | 15,071,183  | cCTCGGCCCGAAcCaCc_gGACTCcGTcgcC    | <i>prkcz</i>             | Intron 12     | 7                                | 26/26                | 0/26              |
| 2 | 2/3  | Unmap. | 125,224,504 | cCTCGcCaCacAcaCAcacCACTCGGACCgGg   |                          | Desert        | 7                                | 25/25                | 0/25              |
| 3 | 2/3  | chr11  | 1,589,395   | TCTctGCCgcccGCcgcGtCTCGGTCCcGg     | <i>zgc:136857</i>        | Exon 6        | 9                                | 34/34                | 0/34              |
| 4 | 2    | chr20  | 2,693,549   | aCTCGGCCaacTcaCtggCACTCGGTtCaGt    |                          | Intergenic    | 7                                | 28/28                | 0/28              |
| 5 | 2    | chr20  | 285,141     | cTgCGGCCCGAActCctcGTACTCGGgggcGc   | <i>si:ch211-241j12.3</i> | Exon 7 (stop) | 2                                | 7/7                  | 0/7               |
| 6 | 3    | chr3   | 26,364,497  | aCTctGCTCTAATattgatTACTtGGTCaTGg   |                          | Intron 1      | 4                                | 15/15                | 0/15              |
| 7 | 3    | chr19  | 25,689,552  | gCTCacCCCaAAcaatcTtGACTCGGTtCaGg   |                          | Intergenic    | 3                                | 12/12                | 0/12              |



**Supplementary Figure 11: Analysis of ZFN action at potential off-target sites, continued.**

Sequencing of the *ntl* progeny fails to identify mutant chromatids at potential off-target sites. Each of the following panels presents the sequencing and additional genotyping data for all the potential off-target sites, listed by number as in Fig. S11C. The chromatids were genotyped by amplifying the respective stretches by PCR (primers listed in Supplementary Table 3), followed by TOPO cloning and sequencing. (a) Representative chromatograms selected from *ntl* progeny of founders A-D (when applicable) are shown. In each case, the potential off-target sites are indicated with black boxes. In some cases, in addition to direct sequencing, we were able to use a mismatch sensitive endonuclease assay (unless the animal is heterozygous for a naturally occurring SNP in the region), or, if the ZFN target site overlaps with a restriction enzyme site, to do a loss-of-RFLP assay. (b) Gel-based genotyping assays using restriction enzymes or mismatch sensitive nucleases. In both cases, we used DNA extracted from wild-type progeny as a control.

Supplementary Figure 11, off-target 1

1a

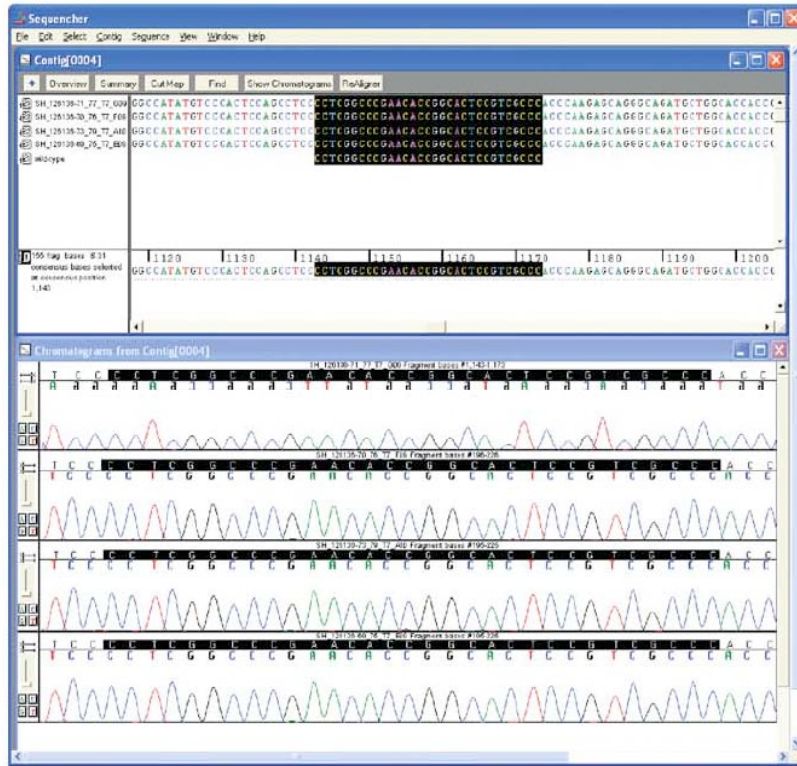

b

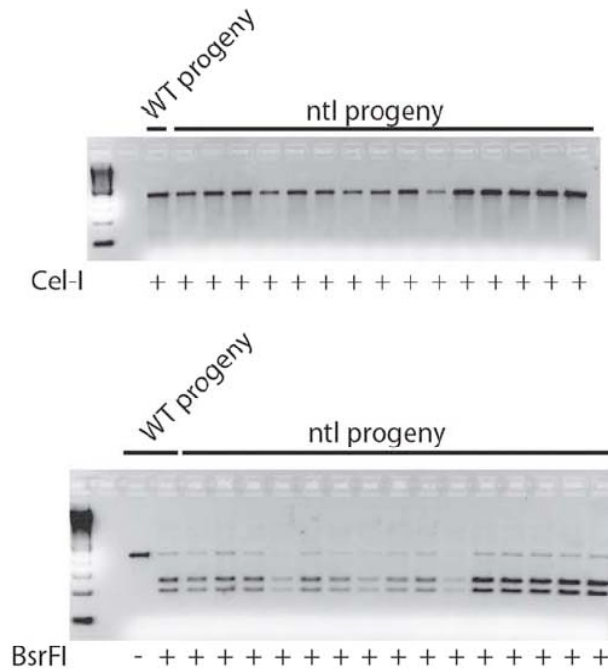

Supplementary Figure 11, off-targets 2 and 3

2a

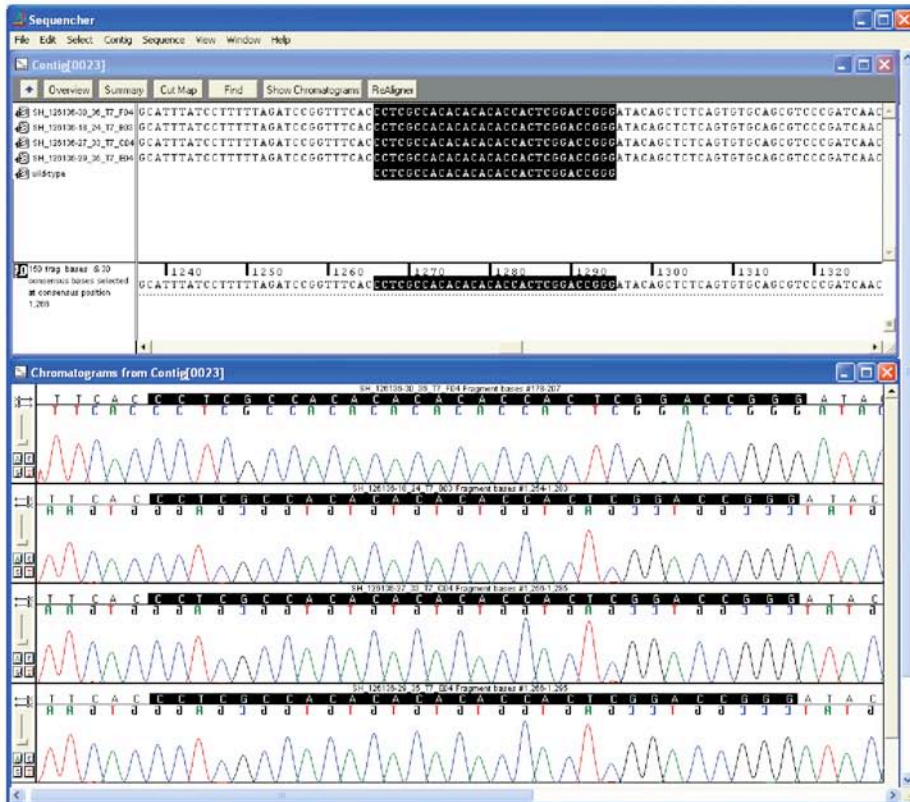

3a

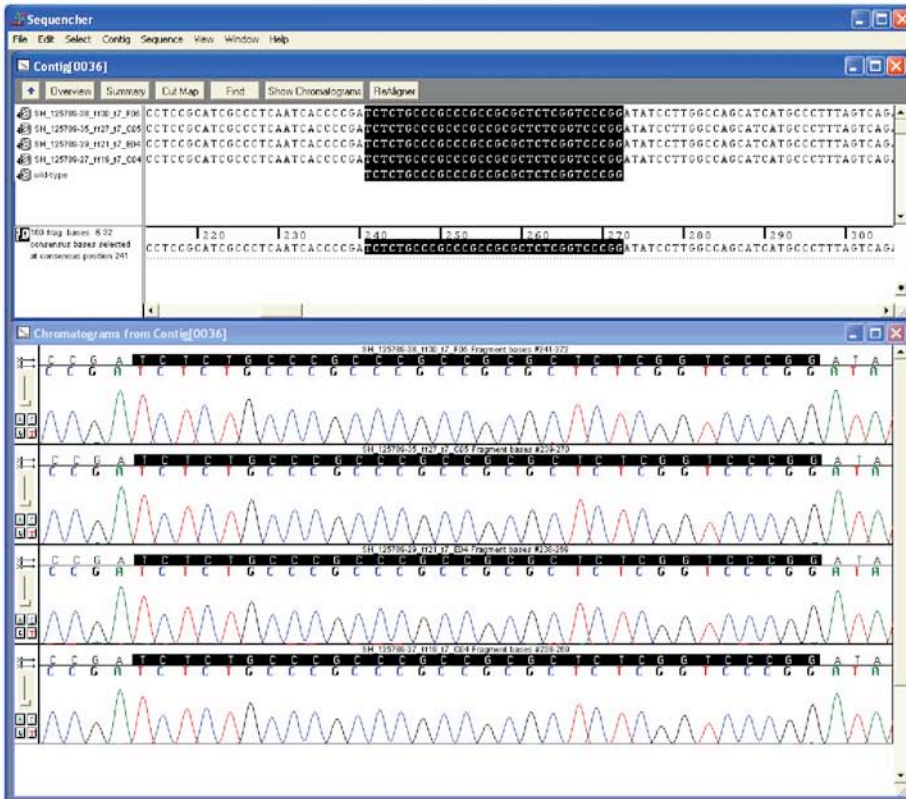

Supplementary Figure 11, off-target 4

4a

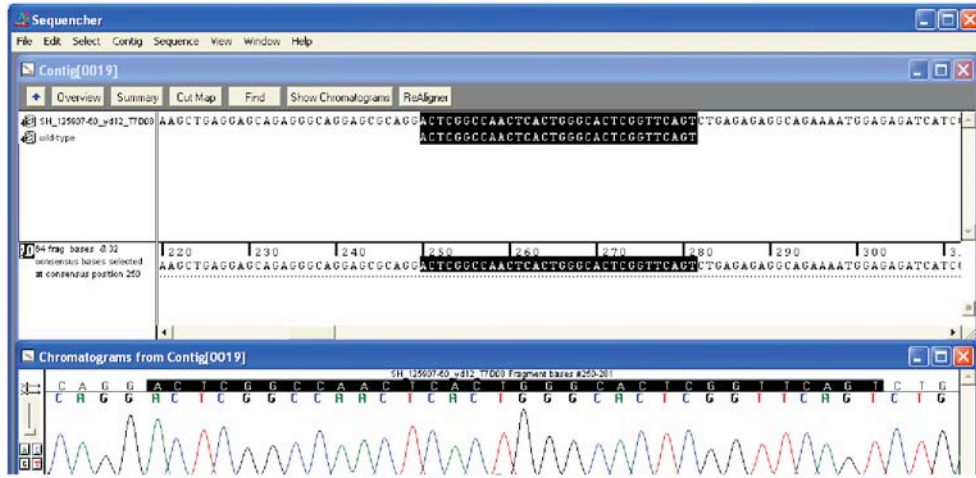

b

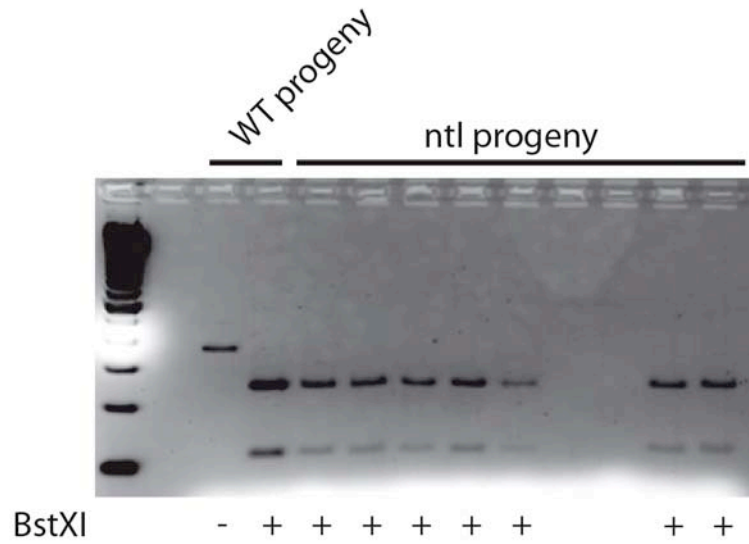

Supplementary Figure 11, off-target 5

5a

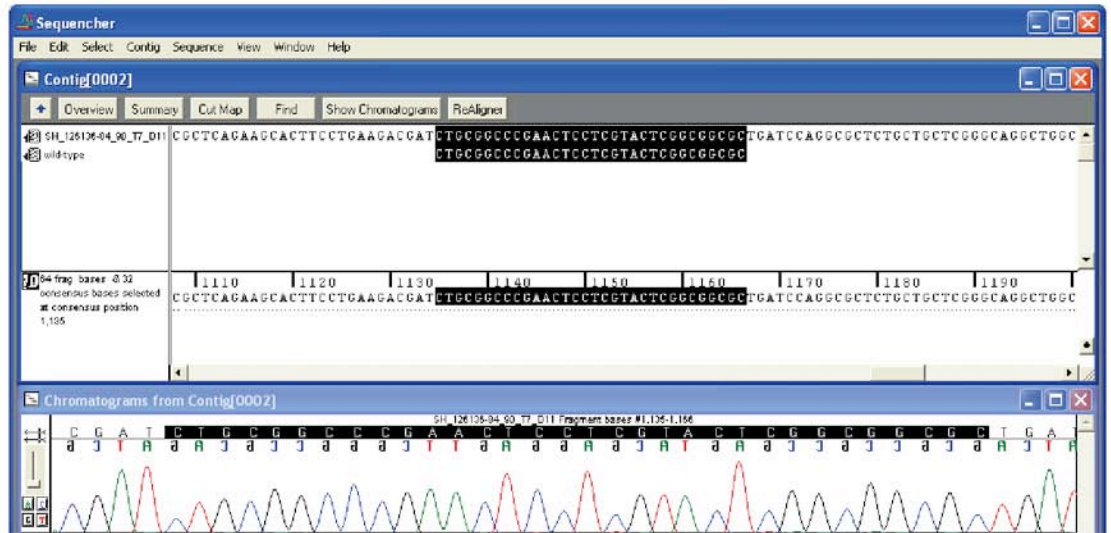

b

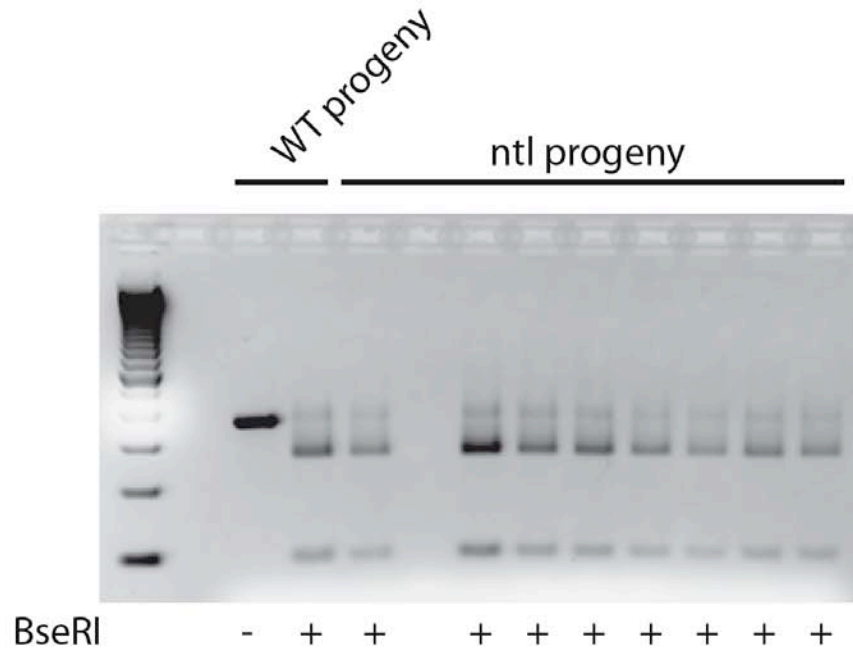



Supplementary Figure 11, off-targets 6 and 7

6a

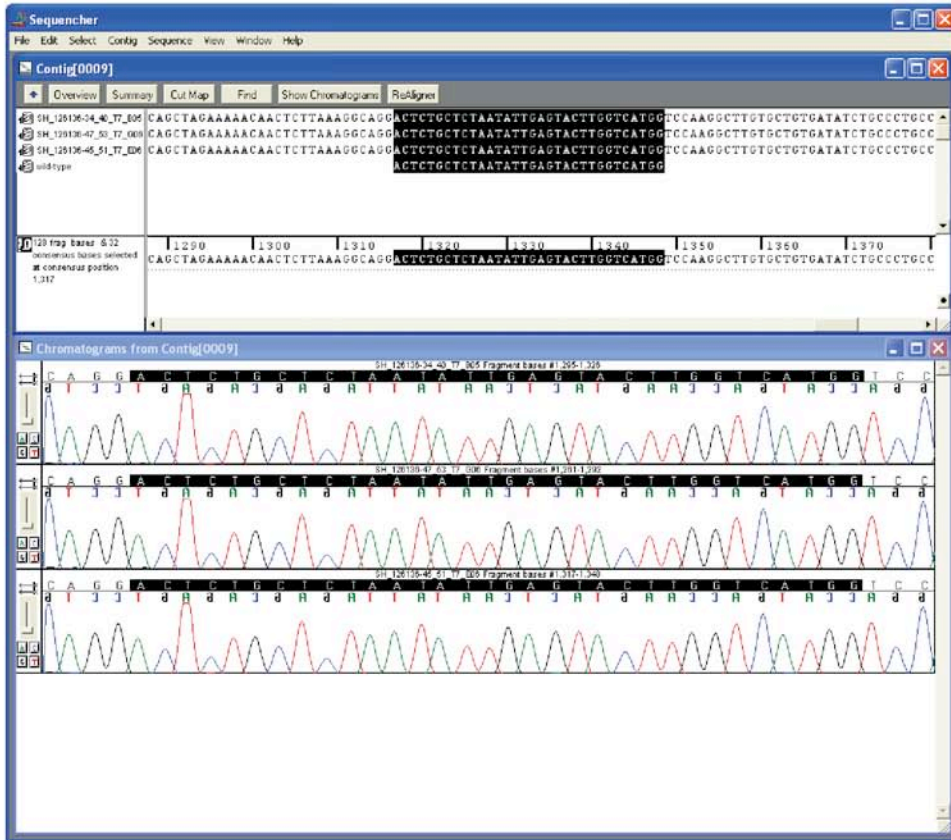

7a

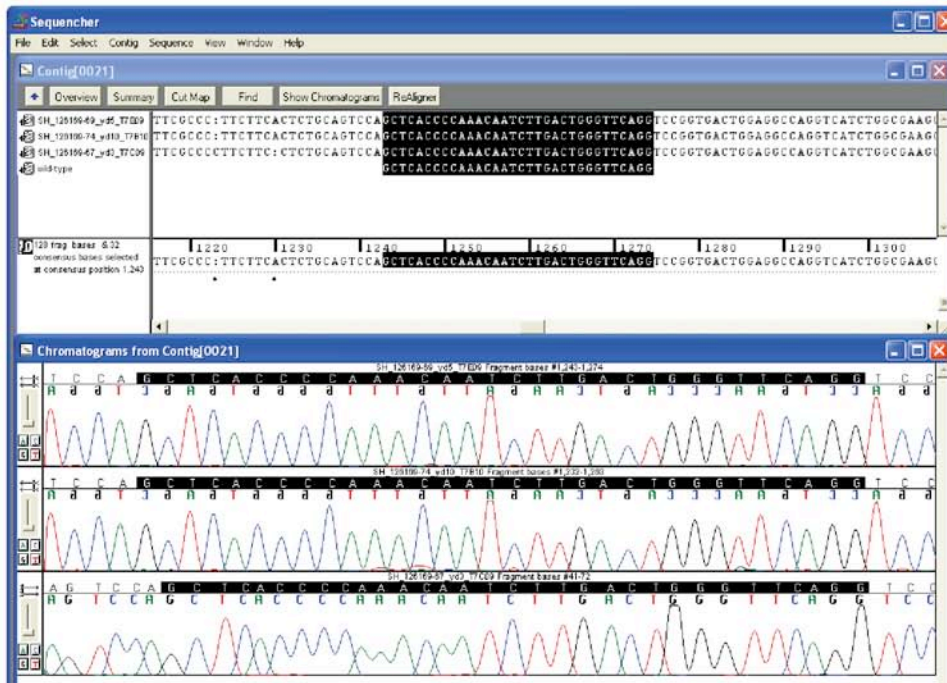

**Supplementary Table 1**

ZFN pairs designed against the *golden* locus (data on their testing is shown in Fig. 2A)

| ZFN pair # | The codon in the <i>slc24a5</i> locus at which the DSB is induced is indicated by the cognate amino acid number in the ORF |
|------------|----------------------------------------------------------------------------------------------------------------------------|
| 1          | Ile 166                                                                                                                    |
| 2          | Ile 166                                                                                                                    |
| 3          | Ser 355                                                                                                                    |
| 4          | Ser 355                                                                                                                    |
| 5          | Asp 381                                                                                                                    |
| 6          | Asp 381                                                                                                                    |
| 7          | Asp 381                                                                                                                    |
| 8          | Asp 381                                                                                                                    |
| 9          | Asp 397                                                                                                                    |
| 10         | Asp 397                                                                                                                    |
| 11         | Val 399                                                                                                                    |
| 12         | Ala 400                                                                                                                    |
| 13         | Ala 400                                                                                                                    |
| 14         | Val 437                                                                                                                    |
| 15         | Val 437                                                                                                                    |
| 16         | His 471                                                                                                                    |
| 17         | His 471                                                                                                                    |
| 18         | Glu 500                                                                                                                    |
| 19         | Glu 500                                                                                                                    |
| 20         | Glu 500                                                                                                                    |
| 21         | Glu 500                                                                                                                    |

**Supplementary Table 2**

ZFN pairs designed against the *ntl* locus (data on their testing is shown in Fig. 3A)

| ZFN pair # | The codon in the <i>ntl</i> locus at which the DSB is induced is indicated by the cognate amino acid number in the ORF |
|------------|------------------------------------------------------------------------------------------------------------------------|
| 1          | Leu 14                                                                                                                 |
| 2          | Ala 79                                                                                                                 |
| 3          | Ala 79                                                                                                                 |
| 4          | Trp 95                                                                                                                 |
| 5          | Asn 124                                                                                                                |

**Supplementary Table 3**

Primer sequences used to genotype potential off-target sites for ZFN action

| # | Primers                                                       |
|---|---------------------------------------------------------------|
| 1 | CAGAAGTAAAGCCTGTTTCAGTTTCATC<br>TGCTTCTCTGTCTGTTCTGTGCTG      |
| 2 | ACTCTCACACACACAAGATTAACGATG<br>GCATGAAATCTCTATTCTCATCTATTCTGC |
| 3 | GTGTGTGTGGGGATGTGAAGATG<br>ATTAGGCCGGATCTTACACCAGC            |
| 4 | ACCTTGTATCCGCACACTTGATTT<br>TTGCAACTCTAATCCAGCACCTC           |
| 5 | GTGTTGTACAGGTATGACCGCTCTT<br>GCTAAAAGGGTCCGTCAGAAGGC          |
| 6 | ACATAAGACTTTTTGTGGTCC<br>TCAGATATGCAAACCAACATGTGC             |
| 7 | GGCATACTGAACTAGCGGCTACC<br>CTTCACTCTGCAGTCCAGCTCAC            |

**Supplementary Table 4**

Plasmid designations for ZFN expression vectors

| Target gene | ZFN pair # | Yeast expression vectors       | Zebrafish expression vectors |
|-------------|------------|--------------------------------|------------------------------|
| <i>gol</i>  | 1          | pSGYDLeu-12776, pSGYDHis-12775 | pVAX-12776-2A-12775          |
| <i>gol</i>  | 14         | pSGYDLeu-12805, pSGYDHis-12804 | pVAX-12805-2A-12804          |
| <i>gol</i>  | 15         | pSGYDLeu-12806, pSGYDHis-12804 | pVAX-12806-2A-12804          |
| <i>ntl</i>  | 2          | pSGYDLeu-13370, pSGYDHis-13368 | pVAX-13370-2A-13368          |
| <i>ntl</i>  | 3          | pSGYDLeu-13370, pSGYDHis-13369 | pVAX-13370-2A-13369          |
